# Supplementary material for: Quantitative proteomic analysis of milk fat globule membrane (MFGM) proteins in human and bovine colostrum and mature milk samples through iTRAQ labeling
Source: Royal Society of Chemistry journal article supplement (doi:10.1039/c6fo00083e), 2016-01-01
Supplement: c6fo00083e1.xlsx [file c6fo00083e1.xlsx]

## Sheet: Sheet1
Accession	Description	MW [kDa]	calc. pI	Coverage	Proteins	Unique Peptides	RCAM/REF	BFAM/REF	BCAM/REF	RFBM/REF	RCBM/REF	BFBM/REF	BCBM/REF	RFAM/REF	ANOVA p value
G5CC03	Milk fat globule EGF factor 8 protein (Fragment) OS=Capra hircus PE=2 SV=1 - [G5CC03_CAPHI]	44.6158	7.48877	28.39	6	1	0.27306	3.11965	3.31031	0.300157	0.31952	2.5216	2.58795	0.259707	0.00186069
P59665	Neutrophil defensin 1 OS=Homo sapiens GN=DEFA1 PE=1 SV=1 - [DEF1_HUMAN]	10.1942	6.99072	19.15	2	2	0.284378	0.696961	0.496631	3.63711	0.171202	0.397841	0.394871	2.11736	0.0240958
P67975	Beta-lactoglobulin OS=Ovis orientalis musimon GN=LGB PE=1 SV=1 - [LACB_OVIMU]	18.1394	5.37646	42.59	9	3	0.310308	3.45139	2.75889	0.290871	0.205255	3.41886	1.40534	0.287201	0.00684236
A0SWQ7	Kappa casein (Fragment) OS=Capra hircus GN=CSN3 PE=4 SV=1 - [A0SWQ7_CAPHI]	15.904	7.89893	29.79	85	1	0.33149	2.6989	2.09009	0.519657	0.339706	2.11481	3.71787	0.622562	0.0304991
P80195	Glycosylation-dependent cell adhesion molecule 1 OS=Bos taurus GN=GLYCAM1 PE=1 SV=2 - [GLCM1_BOVIN]	17.141	6.68311	28.1	5	5	0.341333	1.08688	6.79108	0.475062	0.336629	0.867476	2.29218	0.448853	0.149305
Q3T101	IGL@ protein OS=Bos taurus GN=IGL@ PE=1 SV=1 - [Q3T101_BOVIN]	24.625	6.11279	26.81	10	3	0.353844	4.21058	0.689892	0.442589	0.352424	3.36294	0.621584	0.495566	0.000875934
B5B3R8	Alpha S1 casein OS=Bos taurus GN=CSN1S1 PE=2 SV=1 - [B5B3R8_BOVIN]	24.4274	5.09717	36.45	12	3	0.355474	3.16002	2.22403	0.282929	0.363569	2.97543	4.69465	0.316802	0.0401015
L8I2N6	Synaptosomal-associated protein (Fragment) OS=Bos mutus GN=M91_00958 PE=3 SV=1 - [L8I2N6_9CETA]	18.1898	4.729	7.78	3	1	0.360189	3.08875	2.07164	0.601312	0.398074	2.11039	1.54944	1.23849	0.0278479
F1MWI1	Clusterin (Fragment) OS=Bos taurus PE=3 SV=2 - [F1MWI1_BOVIN]	42.5583	8.104	9.71	1	1	0.36703	3.50596	1.82488	0.32514	0.357179	2.85451	3.43553	0.27213	0.018185
P02666	Beta-casein OS=Bos taurus GN=CSN2 PE=1 SV=2 - [CASB_BOVIN]	25.0913	5.35107	21.88	22	1	0.378501	2.96942	1.93386	0.494387	0.40635	2.55337	3.67377	0.579446	0.0301239
A0A087WYI3	Folate receptor gamma (Fragment) OS=Homo sapiens GN=FOLR3 PE=4 SV=1 - [A0A087WYI3_HUMAN]	20.6106	7.88428	4.49	6	1	0.394852	3.33336	2.64925	0.496004	0.536481	2.32754	1.79277	0.358403	0.0147252
G5E513	Uncharacterized protein (Fragment) OS=Bos taurus PE=1 SV=1 - [G5E513_BOVIN]	49.9386	5.49072	36.54	1	4	0.396904	3.33746	1.98586	0.587554	0.444333	2.76338	1.20923	0.441988	0.00467859
P80457	Xanthine dehydrogenase/oxidase OS=Bos taurus GN=XDH PE=1 SV=4 - [XDH_BOVIN]	146.696	7.73779	42.57	6	1	0.398879	2.51834	2.54483	0.69289	0.351952	2.17428	3.23974	0.370446	0.00229202
Q95114	Lactadherin OS=Bos taurus GN=MFGE8 PE=1 SV=2 - [MFGM_BOVIN]	47.38	7.15186	48.95	8	7	0.409327	2.52518	3.07193	0.57091	0.474572	2.11726	1.21481	0.732541	0.0993059
G8JKX6	Tetraspanin (Fragment) OS=Bos taurus GN=CD9 PE=3 SV=1 - [G8JKX6_BOVIN]	22.6505	5.59229	3.92	6	1	0.410646	2.49865	2.30782	0.707422	0.535753	1.84684	1.58943	1.18769	0.0309469
G3C8Y5	As1 casein (Fragment) OS=Bubalus bubalis GN=CSN1S1 PE=2 SV=1 - [G3C8Y5_BUBBU]	24.3374	4.89404	22.9	13	1	0.419959	1.52571	2.27718	0.512491	0.553972	2.0515	4.68621	0.551357	0.0724457
M1RB49	Alpha-lactalbumin (Fragment) OS=Bubalus bubalis GN=aLA PE=4 SV=1 - [M1RB49_BUBBU]	5.18061	4.94482	72.73	13	3	0.426008	1.26169	3.07918	0.898893	0.656891	1.07151	2.38289	0.840694	0.00436802
B2R4M6	Protein S100 OS=Homo sapiens PE=2 SV=1 - [B2R4M6_HUMAN]	13.2015	6.12549	63.16	2	7	0.436461	0.557616	0.683646	2.80002	0.363618	0.49504	0.618063	1.97525	0.00701994
B0JYP6	IGK protein OS=Bos taurus GN=IGK PE=2 SV=1 - [B0JYP6_BOVIN]	26.3041	7.25439	26.67	6	5	0.442126	3.13728	1.04178	0.911849	0.505756	2.64442	0.672826	1.02267	0.00138609
Q9TTR6	Putative sodium-glucose cotransporter (Fragment) OS=Bos taurus GN=sglt1 PE=2 SV=1 - [Q9TTR6_BOVIN]	34.7509	5.38916	4.49	4	1	0.443166	2.64643	2.0239	0.844475	0.688771	1.90328	1.01389	1.06823	0.0718156
B1AHF3	NADH-cytochrome b5 reductase 3 membrane-bound form (Fragment) OS=Homo sapiens GN=CYB5R3 PE=1 SV=1 - [B1AHF3_HUMAN]	16.6859	9.72998	5.44	8	1	0.447625	2.56977	2.43038	0.613736	0.427933	1.82855	1.61246	1.27621	0.0459736
C6KGD7	Histatherin OS=Bos taurus PE=2 SV=1 - [C6KGD7_BOVIN]	7.21379	10.228	18.97	2	1	0.450437	1.37148	3.16737	0.62021	0.47792	1.18044	3.84012	0.585508	0.000764283
W5NTG6	Uncharacterized protein (Fragment) OS=Ovis aries GN=TINAGL1 PE=3 SV=1 - [W5NTG6_SHEEP]	52.1689	7.04932	4.95	6	2	0.450644	0.935616	1.11616	2.30245	0.54574	0.681435	1.17693	1.42367	0.0515852
P02663	Alpha-S2-casein OS=Bos taurus GN=CSN1S2 PE=1 SV=2 - [CASA2_BOVIN]	26.0023	8.42627	45.05	18	9	0.452363	1.58945	3.27223	0.342114	0.499324	1.44248	5.75812	0.42444	0.0266795
B5B0D4	Major allergen beta-lactoglobulin OS=Bos taurus PE=2 SV=1 - [B5B0D4_BOVIN]	19.9563	4.94482	67.98	10	5	0.452685	3.18808	2.34904	0.496607	0.552668	2.8063	1.74376	0.428724	0.00143206
E9NST3	Sodium phosphate solute carrier family 34 member 2 OS=Bubalus bubalis GN=Slc34a2 PE=2 SV=1 - [E9NST3_BUBBU]	75.8887	7.59131	8.08	6	6	0.459019	1.67849	3.23959	0.870648	0.496385	1.51566	1.87194	0.862108	0.0448969
P80511	Protein S100-A12 OS=Homo sapiens GN=S100A12 PE=1 SV=2 - [S10AC_HUMAN]	10.5685	6.25244	27.17	1	2	0.463495	0.667753	0.589307	2.77079	0.379678	0.770589	0.852885	1.55501	0.0540137
Q9N138	Peptidyl-prolyl cis-trans isomerase (Fragment) OS=Bos taurus PE=2 SV=1 - [Q9N138_BOVIN]	10.3491	6.771	38.3	28	1	0.47797	2.66543	2.48814	0.512808	0.612835	2.08813	2.40336	0.516233	0.0011335
L8IK69	Histone H2A OS=Bos mutus GN=M91_14430 PE=3 SV=1 - [L8IK69_9CETA]	8.56185	9.81787	33.33	39	2	0.478214	1.81395	2.6227	0.483364	0.575175	1.70435	3.56766	0.487206	0.00416237
B4DE78	cDNA FLJ52141, highly similar to 14-3-3 protein gamma OS=Homo sapiens PE=2 SV=1 - [B4DE78_HUMAN]	23.4876	4.81787	13.04	33	1	0.479851	2.16894	2.51493	0.486832	0.577425	1.99897	3.59165	0.423156	0.00641268
A0A0A7UX81	Cathelicidin 1 (Fragment) OS=Bubalus bubalis GN=CATHL1 PE=4 SV=1 - [A0A0A7UX81_BUBBU]	13.4098	8.00146	13.79	5	1	0.488114	0.603961	3.80193	0.742932	0.401579	0.697595	4.39329	0.873481	0.000204324
D2SZE3	K-casein (Fragment) OS=Ovis vignei GN=CSN3 PE=4 SV=1 - [D2SZE3_OVIVI]	18.0138	6.15088	14.81	84	1	0.500641	2.46214	2.73095	0.563752	0.48958	1.9397	2.8177	0.452934	0.000571505
Q7Z3Y6	Rearranged VH4-34 V gene segment (Fragment) OS=Homo sapiens GN=VH4-34 PE=4 SV=1 - [Q7Z3Y6_HUMAN]	12.8944	7.94287	21.55	18	1	0.501551	0.900913	0.721167	1.5318	0.275668	0.824056	0.923201	2.62003	0.0504106
L8IAF4	Ig lambda-1 chain C regions (Fragment) OS=Bos mutus GN=M91_02158 PE=4 SV=1 - [L8IAF4_9CETA]	11.1785	8.6167	34.29	1	1	0.502839	3.08297	1.10641	0.651905	0.449639	2.6829	0.997273	0.708942	0.000274508
Q6UX06	Olfactomedin-4 OS=Homo sapiens GN=OLFM4 PE=1 SV=1 - [OLFM4_HUMAN]	57.2438	5.69385	39.8	2	15	0.504746	0.765907	0.807715	2.19625	0.621662	0.749314	0.810785	1.76519	0.0027542
Q28078	Epithelial mucin (Fragment) OS=Bos taurus GN=MUC1 PE=4 SV=1 - [Q28078_BOVIN]	20.9167	7.35693	10.42	5	2	0.507657	1.32233	4.46225	0.49614	0.542142	1.22987	1.94846	0.588069	0.106185
L8I3I4	Beta-1,4-galactosyltransferase 1 (Fragment) OS=Bos mutus GN=M91_04149 PE=4 SV=1 - [L8I3I4_9CETA]	43.3092	9.23193	6.96	5	3	0.518127	3.74131	1.06089	0.593092	0.609537	2.81103	0.819561	0.487764	0.00354069
Q0VCN9	Folate receptor 2 (Fetal) OS=Bos taurus GN=FOLR2 PE=2 SV=1 - [Q0VCN9_BOVIN]	29.3129	7.6499	2.77	2	1	0.525094	4.22601	0.91942	0.462292	0.708385	3.22836	0.729956	0.487323	0.00234776
S6BGD4	IgG H chain OS=Homo sapiens PE=2 SV=1 - [S6BGD4_HUMAN]	24.9997	9.48096	11.11	1	1	0.533448	0.676412	0.663974	1.58559	0.738567	0.600948	0.691446	2.73908	0.0495171
K9ZSC8	K-casein (Fragment) OS=Tragelaphus oryx GN=CSN3 PE=4 SV=1 - [K9ZSC8_TRAOR]	14.4233	6.26514	13.64	1	1	0.535202	2.86967	1.78657	0.578356	0.447011	1.45508	2.15856	0.635489	0.0616104
Q9NPP6	Immunoglobulin heavy chain variant (Fragment) OS=Homo sapiens PE=2 SV=1 - [Q9NPP6_HUMAN]	44.758	6.12549	52.64	7	2	0.535851	0.674144	0.556363	2.16367	0.737061	0.63157	0.708316	2.27356	0.000196738
L8ICQ2	5'-nucleotidase (Fragment) OS=Bos mutus GN=M91_20600 PE=3 SV=1 - [L8ICQ2_9CETA]	62.5102	7.03467	5.27	3	2	0.538032	1.88048	3.12805	0.615925	0.568118	1.54183	2.30771	0.623992	0.00634066
A0A068LKQ0	Ig heavy chain variable region (Fragment) OS=Homo sapiens PE=4 SV=1 - [A0A068LKQ0_HUMAN]	13.3445	5.98584	10	1	1	0.549919	1.03499	0.915842	1.56903	0.575473	0.862648	0.662035	2.54546	0.0482592
L8HPF5	Ig gamma-1 chain C region (Fragment) OS=Bos mutus GN=M91_07836 PE=4 SV=1 - [L8HPF5_9CETA]	11.3608	6.29053	65.35	1	4	0.557668	3.72273	1.01419	0.573715	0.679767	2.99526	0.861794	0.893675	0.00187075
Q96QS0	Putative matrix cell adhesion molecule-3 OS=Homo sapiens PE=1 SV=1 - [Q96QS0_HUMAN]	17.4854	9.29053	6.92	1	1	0.568342	0.869227	0.764758	1.70739	0.49142	0.865502	1.09587	2.55308	0.0275684
K7EMV3	Histone H3 OS=Homo sapiens GN=H3F3B PE=1 SV=1 - [K7EMV3_HUMAN]	10.3278	11.8247	7.61	41	1	0.568765	0.812963	1.36726	1.98541	0.4828	0.744321	0.989093	1.9399	0.00191775
E1B9L0	Uncharacterized protein OS=Bos taurus GN=FCGR2B PE=4 SV=1 - [E1B9L0_BOVIN]	24.9385	9.5835	6.36	5	1	0.569107	2.93273	1.23333	0.577422	0.550633	3.06732	1.49229	0.636755	6.04378e-05
P31946	14-3-3 protein beta/alpha OS=Homo sapiens GN=YWHAB PE=1 SV=3 - [1433B_HUMAN]	28.0648	4.83057	10.98	31	1	0.570129	2.48373	1.86466	0.639355	0.631166	1.97687	3.20867	0.447075	0.0332542
K9ZS80	K-casein (Fragment) OS=Bison bonasus GN=CSN3 PE=4 SV=1 - [K9ZS80_BISBO]	14.4003	6.771	32.58	28	3	0.574165	2.29382	2.12044	0.537405	0.573389	2.14234	3.8587	0.542856	0.0374642
Q6N092	Putative uncharacterized protein DKFZp686K18196 (Fragment) OS=Homo sapiens GN=DKFZp686K18196 PE=1 SV=1 - [Q6N092_HUMAN]	56.3879	6.93213	39.11	3	2	0.574292	0.887162	1.00779	1.72744	0.549625	0.838898	0.865237	2.03577	0.00160301
A9YY83	Beta casein (Fragment) OS=Bos indicus PE=4 SV=1 - [A9YY83_BOSIN]	17.3021	7.63525	21.94	16	1	0.574456	2.30609	1.39087	0.770128	0.641109	1.67202	2.381	1.23696	0.0891082
F1MQB0	Perilipin OS=Bos taurus GN=PLIN2 PE=3 SV=1 - [F1MQB0_BOVIN]	45.0783	8.41162	65.94	10	14	0.581923	2.49728	2.17749	0.708061	0.604402	1.94988	1.5865	0.643652	0.00975894
F1MGR1	Sodium/nucleoside cotransporter OS=Bos taurus GN=SLC28A3 PE=3 SV=2 - [F1MGR1_BOVIN]	77.2283	7.43018	5.45	4	3	0.582489	2.63202	1.36667	0.891055	0.618076	2.08042	0.935906	1.02768	0.00854027
P05109	Protein S100-A8 OS=Homo sapiens GN=S100A8 PE=1 SV=1 - [S10A8_HUMAN]	10.8276	7.03467	55.91	1	7	0.582801	0.477937	0.557152	2.66376	0.474368	0.516199	0.641578	2.0671	0.00243647
P15497	Apolipoprotein A-I OS=Bos taurus GN=APOA1 PE=1 SV=3 - [APOA1_BOVIN]	30.2579	5.97314	19.62	6	3	0.5831	2.7627	1.17082	0.599292	0.67153	2.28021	0.88817	0.582971	0.00182905
Q27984	Alpha1-antichymotrypsin isoform pHHK12 (Fragment) OS=Bos taurus PE=2 SV=1 - [Q27984_BOVIN]	46.9242	6.27783	2.16	7	1	0.586008	4.27331	0.997306	0.505414	0.545737	3.08816	0.802437	0.533046	0.00453495
Q4GZT4	ATP-binding cassette sub-family G member 2 OS=Bos taurus GN=ABCG2 PE=3 SV=2 - [ABCG2_BOVIN]	72.6779	8.66064	13.28	15	8	0.588868	1.79309	3.31761	0.580435	0.557886	1.52655	1.89054	0.524947	0.0419367
F5GZQ4	L-lactate dehydrogenase A chain (Fragment) OS=Homo sapiens GN=LDHA PE=1 SV=1 - [F5GZQ4_HUMAN]	7.87011	4.65283	20.83	7	1	0.588924	1.1382	1.0268	1.00716	1.22013	1.04697	1.36588	1.92796	0.625683
Q6LBN7	Lactoferrin (Fragment) OS=Bos taurus PE=2 SV=1 - [Q6LBN7_BOVIN]	75.1335	8.1333	14.39	30	7	0.592213	1.38156	1.73779	1.00203	0.682035	1.12985	2.63304	1.0464	0.0370138
B9A064	Immunoglobulin lambda-like polypeptide 5 OS=Homo sapiens GN=IGLL5 PE=2 SV=2 - [IGLL5_HUMAN]	23.0486	8.83643	40.65	23	2	0.594808	0.696832	0.512583	1.49742	0.905986	0.67952	0.549184	2.04167	0.0159258
M9WP41	BTN1A1 OS=Bubalus bubalis PE=2 SV=1 - [M9WP41_BUBBU]	59.2247	5.19873	52.09	33	1	0.598469	2.89124	2.13165	0.436703	0.727445	2.35553	1.36638	0.456163	0.00837329
A0A087X2C0	Ig mu chain C region OS=Homo sapiens GN=IGHM PE=1 SV=1 - [A0A087X2C0_HUMAN]	64.0658	7.13721	32.31	18	2	0.600164	0.751928	0.865572	1.1527	0.520062	0.81211	1.07993	2.96082	0.239988
S6BGD6	IgG L chain OS=Homo sapiens PE=1 SV=1 - [S6BGD6_HUMAN]	24.8081	7.23975	43.83	18	1	0.614611	0.775444	1.07835	1.31275	0.79773	0.940976	1.13678	2.38461	0.134665
P01833	Polymeric immunoglobulin receptor OS=Homo sapiens GN=PIGR PE=1 SV=4 - [PIGR_HUMAN]	83.2317	5.74463	40.71	1	25	0.615264	0.710125	0.657759	1.85064	0.62857	0.703377	0.754251	2.33152	0.00274814
Q96S86	Hyaluronan and proteoglycan link protein 3 OS=Homo sapiens GN=HAPLN3 PE=2 SV=1 - [HPLN3_HUMAN]	40.8684	6.52197	51.94	14	16	0.618296	0.686018	0.707469	2.35943	0.685547	0.76365	0.759868	1.2729	0.100856
A6QNW3	PIGR protein OS=Bos taurus GN=PIGR PE=2 SV=1 - [A6QNW3_BOVIN]	82.4552	7.28369	19.95	7	10	0.619934	1.6144	1.94743	0.932987	0.659391	1.64425	1.26254	1.12436	0.043006
Q6VUQ8	Beta-2-microglobulin (Fragment) OS=Bos taurus GN=B2M PE=4 SV=1 - [Q6VUQ8_BOVIN]	7.86586	6.75635	14.93	12	1	0.625761	3.12928	1.03986	0.758481	0.66572	2.29736	1.1921	0.796843	0.00698709
D3K478	Myeloid membrane glycoprotein (Fragment) OS=Bubalus bubalis GN=CD14 PE=2 SV=1 - [D3K478_BUBBU]	13.5544	8.83643	12.7	16	1	0.633225	2.3743	2.83116	0.785073	0.621508	1.72399	1.43621	0.505854	0.0866337
A0A087WTX5	Ig kappa chain C region OS=Homo sapiens GN=IGKC PE=4 SV=1 - [A0A087WTX5_HUMAN]	25.6077	7.97217	42.8	13	1	0.634101	1.44117	2.35277	0.877131	0.830422	1.49828	2.34417	0.745638	0.000141978
P02769	Serum albumin OS=Bos taurus GN=ALB PE=1 SV=4 - [ALBU_BOVIN]	69.2484	6.17627	18.29	7	7	0.642414	2.2836	1.54763	0.812131	0.700465	2.01255	1.30487	0.791	0.00108957
F1N726	Uncharacterized protein OS=Bos taurus GN=GP2 PE=4 SV=1 - [F1N726_BOVIN]	59.2105	4.81787	20.04	2	9	0.648468	1.25969	2.59881	0.730343	0.757405	1.11254	1.91922	0.808981	0.01023
S6BGF9	IgG L chain OS=Homo sapiens PE=2 SV=1 - [S6BGF9_HUMAN]	22.7283	8.00146	38.03	13	1	0.652579	0.766406	0.611182	2.07674	0.766718	0.67827	0.528239	2.10248	3.96797e-05
F1N647	Fatty acid synthase OS=Bos taurus GN=FASN PE=1 SV=2 - [F1N647_BOVIN]	274.092	6.45557	8	4	7	0.652949	1.84871	2.18463	0.80462	0.712329	1.40252	1.93826	0.67057	0.00432931
B4E0R1	Integrin beta OS=Homo sapiens PE=2 SV=1 - [B4E0R1_HUMAN]	77.3044	6.88818	3.43	47	2	0.658828	0.902744	1.02562	1.86583	0.548344	0.727246	0.982576	1.96533	0.000339702
D6RD17	Immunoglobulin J chain (Fragment) OS=Homo sapiens GN=IGJ PE=1 SV=3 - [D6RD17_HUMAN]	18.1101	5.60498	27.85	4	2	0.659742	0.716859	0.730588	1.79439	0.798719	0.659669	0.624021	2.1852	0.0023902
Q6MZQ6	Putative uncharacterized protein DKFZp686G11190 OS=Homo sapiens GN=DKFZp686G11190 PE=1 SV=1 - [Q6MZQ6_HUMAN]	52.01	8.06006	16.21	20	1	0.660463	0.603602	0.927858	1.42292	0.632857	0.885859	0.786105	2.77659	0.113508
Q58DP6	Ribonuclease 4 OS=Bos taurus GN=RNASE4 PE=2 SV=1 - [Q58DP6_BOVIN]	16.9273	8.85107	27.89	5	3	0.662211	2.26861	1.39757	0.678138	0.820824	2.13969	1.6576	0.687659	0.00055317
Q6N089	Putative uncharacterized protein DKFZp686P15220 OS=Homo sapiens GN=DKFZp686P15220 PE=1 SV=1 - [Q6N089_HUMAN]	51.6918	7.92822	16.31	23	1	0.668408	0.728235	0.647666	1.50254	0.596245	0.888604	0.900479	2.55041	0.0639662
A0JNP2	Secretoglobin family 1D member OS=Bos taurus GN=SCGB1D PE=3 SV=2 - [SG1D_BOVIN]	11.287	8.1626	19.61	2	2	0.67104	1.27858	2.15068	0.813461	0.715561	1.35604	2.38045	0.877578	0.000212245
W5PZU1	Uncharacterized protein OS=Ovis aries PE=4 SV=1 - [W5PZU1_SHEEP]	13.6407	4.50049	22.58	10	2	0.67291	2.09811	1.73748	0.704333	0.821223	1.75043	1.70324	0.635699	0.00151649
Q08431	Lactadherin OS=Homo sapiens GN=MFGE8 PE=1 SV=2 - [MFGM_HUMAN]	43.0955	8.14795	77.78	6	6	0.680007	0.60218	0.633965	2.65244	0.562554	0.619263	0.670325	1.76236	0.0171898
P01609	Ig kappa chain V-I region Scw OS=Homo sapiens PE=1 SV=1 - [KV117_HUMAN]	11.7568	5.99854	27.78	17	1	0.684057	0.698561	0.943274	1.49953	0.530355	0.86338	0.982716	2.63719	0.0735768
P12273	Prolactin-inducible protein OS=Homo sapiens GN=PIP PE=1 SV=1 - [PIP_HUMAN]	16.5618	8.04541	36.99	1	4	0.68458	0.824895	0.778088	2.19229	0.704165	0.688746	0.657365	1.407	0.0438347
Q6P5S8	IGK@ protein OS=Homo sapiens GN=IGK@ PE=1 SV=1 - [Q6P5S8_HUMAN]	25.7568	6.32861	42.8	13	1	0.688583	0.561188	0.584118	2.0359	0.642624	0.630203	0.688731	2.3705	0.000552232
P62258	14-3-3 protein epsilon OS=Homo sapiens GN=YWHAE PE=1 SV=1 - [1433E_HUMAN]	29.1554	4.7417	23.14	38	2	0.689368	2.19342	1.33234	0.702274	0.846364	1.88537	1.60564	0.640051	0.00273892
A0N5G5	Rheumatoid factor D5 light chain (Fragment) OS=Homo sapiens GN=V<kappa>3 PE=2 SV=1 - [A0N5G5_HUMAN]	12.7585	8.96826	22.88	5	2	0.695061	0.834926	0.806146	1.22386	0.792579	0.829979	1.02852	2.66909	0.213247
A0A075B6N7	Ig alpha-2 chain C region (Fragment) OS=Homo sapiens GN=IGHA2 PE=4 SV=1 - [A0A075B6N7_HUMAN]	36.568	6.26514	57.06	1	1	0.695266	0.756022	0.743008	2.09634	0.841366	0.74332	0.617171	1.14018	0.138298
E1BGX8	Uncharacterized protein OS=Bos taurus GN=HHIPL2 PE=4 SV=1 - [E1BGX8_BOVIN]	81.1271	9.31982	9.81	3	7	0.695329	2.26821	1.72995	0.717469	0.739098	1.71722	1.80994	0.835313	0.00626447
G5E5T5	Uncharacterized protein (Fragment) OS=Bos taurus GN=IGHM PE=1 SV=1 - [G5E5T5_BOVIN]	42.4421	5.021	44.22	3	4	0.697443	2.25924	1.59549	0.637	0.879987	2.01066	2.14878	0.610134	0.00553788
P01598	Ig kappa chain V-I region EU OS=Homo sapiens PE=1 SV=1 - [KV106_HUMAN]	11.7808	8.44092	26.85	3	2	0.699552	1.1531	1.00731	1.33903	0.769366	1.00793	0.852348	1.95653	0.0625192
L8HW65	Keratin, type II cytoskeletal 7 OS=Bos mutus GN=M91_10626 PE=3 SV=1 - [L8HW65_9CETA]	51.5896	6.30322	4.08	107	1	0.701425	2.29416	1.0791	0.98382	0.758903	2.0348	1.39833	1.00488	0.00236025
G3N0V0	Uncharacterized protein (Fragment) OS=Bos taurus PE=1 SV=1 - [G3N0V0_BOVIN]	35.9288	7.84033	20.55	2	4	0.703212	2.86431	0.866426	0.840955	0.814429	2.47348	0.820423	0.886646	0.00049175
P78328	HP47 protein (Fragment) OS=Homo sapiens GN=SPAG10 PE=2 SV=1 - [P78328_HUMAN]	8.69047	7.04932	69.23	1	1	0.703933	1.47983	1.38263	1.44936	0.772831	1.24901	1.68522	1.03497	0.0606105
P10152	Angiogenin-1 OS=Bos taurus GN=ANG1 PE=1 SV=4 - [ANG1_BOVIN]	16.9585	8.85107	20.95	2	2	0.70431	1.75864	1.97427	0.787262	0.628549	1.51848	2.85954	0.837273	0.0171201
A5D7Q2	Putative uncharacterized protein OS=Bos taurus PE=2 SV=1 - [A5D7Q2_BOVIN]	51.6377	6.62451	21.56	4	5	0.704348	1.64992	2.67762	0.87774	0.824778	1.48122	1.85939	0.7582	0.020697
L8HLI3	Butyrophilin subfamily 1 member A1 OS=Bos mutus GN=M91_00347 PE=4 SV=1 - [L8HLI3_9CETA]	59.2358	5.19873	52.09	31	1	0.710154	2.43727	1.58834	0.789632	0.872499	1.79254	1.94257	0.578263	0.0153304
Q0KKI6	Immunoblobulin light chain (Fragment) OS=Homo sapiens PE=1 SV=1 - [Q0KKI6_HUMAN]	24.015	8.06006	44.75	35	1	0.710175	0.88295	0.933497	1.50372	0.764945	0.997983	0.87348	2.02662	0.0192642
P04220	Ig mu heavy chain disease protein OS=Homo sapiens PE=1 SV=1 - [MUCB_HUMAN]	43.0303	5.23682	36.06	1	1	0.712304	1.3195	1.42459	1.01458	0.811225	1.35244	1.83739	1.4881	0.0738469
G3X7A5	Complement C3 OS=Bos taurus GN=C3 PE=1 SV=1 - [G3X7A5_BOVIN]	187.028	7.02002	5.12	5	5	0.719872	2.13581	1.41887	0.760136	0.614292	2.0734	1.54826	0.961008	0.000364135
Q0ZCB4	Apolipoprotein E (Fragment) OS=Bos taurus PE=4 SV=1 - [Q0ZCB4_BOVIN]	27.0571	8.89502	6.33	3	1	0.720061	1.86023	0.999061	1.0127	0.875699	1.84839	1.06982	1.36168	0.00614174
W5Q7I2	Uncharacterized protein (Fragment) OS=Ovis aries PE=4 SV=1 - [W5Q7I2_SHEEP]	30.8665	5.85889	5.82	2	1	0.722218	1.99613	0.785091	0.88695	0.785724	2.34028	0.635161	0.872171	0.00109662
Q6N041	Putative uncharacterized protein DKFZp686O16217 (Fragment) OS=Homo sapiens GN=DKFZp686O16217 PE=2 SV=1 - [Q6N041_HUMAN]	54.0905	7.18115	31.93	2	1	0.722529	1.40594	1.14201	0.828146	0.71909	1.28479	1.1579	2.21941	0.487065
A5JSS5	As2-casein (Fragment) OS=Capra hircus PE=2 SV=1 - [A5JSS5_CAPHI]	12.8477	9.62744	23.15	1	1	0.72473	1.31862	2.04807	1.06722	0.700178	1.27227	2.55437	0.867127	0.00439561
P01625	Ig kappa chain V-IV region Len OS=Homo sapiens PE=1 SV=2 - [KV402_HUMAN]	12.6322	7.92822	23.68	5	2	0.725298	0.811031	0.77967	1.70422	0.727678	0.747626	0.884613	2.08087	0.00299823
Q86TT1	Full-length cDNA clone CS0DD006YL02 of Neuroblastoma of Homo sapiens (human) OS=Homo sapiens PE=2 SV=1 - [Q86TT1_HUMAN]	41.2465	6.78564	41.07	1	1	0.725547	1.12349	1.01134	1.66954	0.738037	1.17889	0.884287	1.60747	0.000302588
P05090	Apolipoprotein D OS=Homo sapiens GN=APOD PE=1 SV=1 - [APOD_HUMAN]	21.2618	5.14795	11.64	2	2	0.73738	1.36499	0.633507	1.87617	0.905563	0.570411	0.578007	1.33917	0.149794
O18901	Kappa-casein (Fragment) OS=Syncerus caffer nanus PE=4 SV=1 - [O18901_SYNCA]	12.8906	5.8335	8.47	1	2	0.739476	1.98174	1.44261	0.614569	0.68437	1.50945	2.34931	0.55964	0.0447612
P01903	HLA class II histocompatibility antigen, DR alpha chain OS=Homo sapiens GN=HLA-DRA PE=1 SV=1 - [DRA_HUMAN]	28.5887	4.99561	18.9	79	4	0.743755	1.22889	0.871463	1.73399	0.823581	1.21969	0.842944	1.42959	0.00617575
P01781	Ig heavy chain V-III region GAL OS=Homo sapiens PE=1 SV=1 - [HV320_HUMAN]	12.7222	8.48486	21.55	6	1	0.745786	0.820867	1.04208	1.02831	0.951754	1.39148	1.36285	1.96943	0.534388
Q96K68	cDNA FLJ14473 fis, clone MAMMA1001080, highly similar to Homo sapiens SNC73 protein (SNC73) mRNA OS=Homo sapiens PE=2 SV=1 - [Q96K68_HUMAN]	53.0542	6.85889	41.09	7	1	0.750249	1.1385	0.944268	1.42507	0.727582	1.01319	1.04602	1.9895	0.0376437
P06311	Ig kappa chain V-III region IARC/BL41 OS=Homo sapiens PE=1 SV=1 - [KV311_HUMAN]	14.0611	6.60986	11.72	1	1	0.753196	0.726516	1.58496	1.225	1.3092	0.682163	1.02155	1.52682	0.247521
P62745	Rho-related GTP-binding protein RhoB OS=Homo sapiens GN=RHOB PE=1 SV=1 - [RHOB_HUMAN]	22.1091	5.23682	25.51	4	1	0.756136	1.80533	2.08129	0.513449	0.822249	1.35864	4.22559	0.317577	0.0801074
G3N2D8	Uncharacterized protein OS=Bos taurus GN=GGT1 PE=4 SV=1 - [G3N2D8_BOVIN]	60.8663	6.354	3.35	1	1	0.76532	3.02545	1.85559	0.709066	0.674253	2.11037	0.9389	0.478486	0.0403637
P01619	Ig kappa chain V-III region B6 OS=Homo sapiens PE=1 SV=1 - [KV301_HUMAN]	11.6278	9.24658	16.67	3	2	0.765847	0.843325	0.998914	1.54796	0.750984	1.13782	0.900932	1.80939	0.0111632
A2J1N5	Rheumatoid factor RF-ET6 (Fragment) OS=Homo sapiens PE=2 SV=1 - [A2J1N5_HUMAN]	10.4432	9.12939	30.85	18	1	0.766067	0.497196	0.538454	1.71869	1.09987	0.554273	0.428348	2.30931	0.009582
P08758	Annexin A5 OS=Homo sapiens GN=ANXA5 PE=1 SV=2 - [ANXA5_HUMAN]	35.9144	5.04639	19.69	12	4	0.767088	0.678753	0.926509	1.48959	0.964863	0.767007	0.923195	1.65423	0.00320918
L8IWY0	CD59 glycoprotein OS=Bos mutus GN=M91_01234 PE=4 SV=1 - [L8IWY0_9CETA]	13.6577	7.75244	9.09	2	1	0.767409	2.08537	1.82342	0.877373	0.733908	1.52989	1.44713	0.988834	0.0284234
A2NUT2	Lambda-chain (AA -20 to 215) OS=Homo sapiens PE=1 SV=1 - [A2NUT2_HUMAN]	24.6391	7.62061	40.43	26	2	0.769343	0.587898	0.771517	1.79635	0.661376	0.84443	0.744165	1.95706	0.00122377
C9JEV0	Zinc-alpha-2-glycoprotein OS=Homo sapiens GN=AZGP1 PE=3 SV=1 - [C9JEV0_HUMAN]	26.3372	5.73193	7.05	2	1	0.771072	1.5623	1.46755	1.07599	0.926593	1.38755	1.77933	0.993762	0.0149886
A0A5E4	Uncharacterized protein OS=Homo sapiens PE=2 SV=1 - [A0A5E4_HUMAN]	24.7312	5.93506	40.85	17	1	0.775088	0.755815	1.04045	1.08619	0.736808	0.722611	0.641117	2.92269	0.302156
Q0ZCH9	Immunglobulin heavy chain variable region (Fragment) OS=Homo sapiens PE=4 SV=1 - [Q0ZCH9_HUMAN]	13.4275	8.45557	32.23	31	1	0.780591	0.762583	0.875226	1.40061	0.84184	0.711057	0.928866	2.21578	0.0589445
J3QSU6	Tenascin OS=Homo sapiens GN=TNC PE=1 SV=1 - [J3QSU6_HUMAN]	220.712	4.93213	8.17	15	14	0.780697	0.798712	0.713675	1.92899	0.773267	0.778211	0.648708	1.58744	0.00265305
P17697	Clusterin OS=Bos taurus GN=CLU PE=1 SV=1 - [CLUS_BOVIN]	51.0811	6.03662	26.42	3	8	0.780744	2.62412	0.764306	0.767393	0.720658	2.06665	0.960567	0.891908	0.00453567
L8IY96	Platelet glycoprotein 4 OS=Bos mutus GN=M91_06782 PE=4 SV=1 - [L8IY96_9CETA]	52.8783	8.104	9.32	8	3	0.786057	1.86869	1.9878	0.711676	0.827888	1.44029	1.69897	0.764225	0.00778465
L8IUW7	Serine protease HTRA1 (Fragment) OS=Bos mutus GN=M91_16347 PE=4 SV=1 - [L8IUW7_9CETA]	35.1507	7.21045	3.72	6	1	0.796129	2.76971	0.797371	0.929982	0.623189	2.78255	0.609886	0.864196	6.04414e-05
P02763	Alpha-1-acid glycoprotein 1 OS=Homo sapiens GN=ORM1 PE=1 SV=1 - [A1AG1_HUMAN]	23.4968	5.021	18.91	1	3	0.796272	0.915937	0.99149	2.12723	0.681085	0.780608	0.913685	1.135	0.195844
B4E2V5	cDNA FLJ52062, highly similar to Erythrocyte band 7 integral membrane protein OS=Homo sapiens PE=2 SV=1 - [B4E2V5_HUMAN]	25.9478	7.38623	16.88	8	3	0.801427	0.811404	1.09287	1.68882	0.724181	0.843047	1.03403	1.78478	0.000125246
P61020	Ras-related protein Rab-5B OS=Homo sapiens GN=RAB5B PE=1 SV=1 - [RAB5B_HUMAN]	23.6919	8.1333	11.63	17	1	0.809963	1.29792	1.17822	1.27541	1.51606	0.987004	0.749182	0.953512	0.925814
P35527	Keratin, type I cytoskeletal 9 OS=Homo sapiens GN=KRT9 PE=1 SV=3 - [K1C9_HUMAN]	62.0268	5.23682	9.95	2	4	0.810191	0.917947	1.49611	1.15315	0.867837	1.16596	1.10493	1.25758	0.167959
Q9UL88	Myosin-reactive immunoglobulin heavy chain variable region (Fragment) OS=Homo sapiens PE=2 SV=1 - [Q9UL88_HUMAN]	14.1332	9.62744	14.5	1	1	0.811347	0.704785	0.709206	1.66746	0.740389	0.792792	0.496348	2.35595	0.0158693
G3N1H5	Uncharacterized protein OS=Bos taurus GN=LOC100300806 PE=4 SV=1 - [G3N1H5_BOVIN]	14.0792	8.44092	16.67	4	1	0.815208	1.87803	0.853039	1.19082	0.923104	1.56448	0.784924	1.31714	0.00630542
Q53SY1	Reticulon (Fragment) OS=Homo sapiens GN=RTN4 PE=4 SV=1 - [Q53SY1_HUMAN]	20.9235	9.08545	8.56	15	1	0.816392	2.498	1.2709	0.698713	0.815978	1.83419	1.8619	0.822708	0.0304452
Q13747	Alpha-1 antitrypsin (Fragment) OS=Homo sapiens PE=2 SV=1 - [Q13747_HUMAN]	22.8139	6.55127	9.64	11	2	0.816547	0.742278	1.0676	1.38314	1.46451	1.13628	0.755742	0.975854	0.787937
A0A075B6H6	Ig kappa chain C region (Fragment) OS=Homo sapiens GN=IGKC PE=4 SV=1 - [A0A075B6H6_HUMAN]	11.7117	5.87158	80.37	1	1	0.818178	1.20612	1.05544	1.14854	0.88376	1.30688	1.64713	1.46255	0.282162
Q99102	Mucin-4 OS=Homo sapiens GN=MUC4 PE=1 SV=4 - [MUC4_HUMAN]	231.373	6.26514	3.27	11	4	0.82044	1.30554	0.940266	1.10172	1.07469	1.24568	1.84604	1.03136	0.588769
P13645	Keratin, type I cytoskeletal 10 OS=Homo sapiens GN=KRT10 PE=1 SV=6 - [K1C10_HUMAN]	58.7917	5.21143	7.88	10	3	0.822929	1.35651	1.28868	1.53939	0.855278	0.975818	1.49521	0.875503	0.378337
G3V3A0	Alpha-1-antichymotrypsin OS=Homo sapiens GN=SERPINA3 PE=3 SV=1 - [G3V3A0_HUMAN]	23.3911	5.64307	13.66	3	2	0.823558	1.10649	0.976255	1.74188	1.1357	1.04318	0.941857	1.03769	0.458914
Q9UL90	Myosin-reactive immunoglobulin heavy chain variable region (Fragment) OS=Homo sapiens PE=2 SV=1 - [Q9UL90_HUMAN]	12.4291	8.44092	42.48	37	1	0.832679	0.981126	0.895692	1.37068	0.838538	0.927479	0.865136	2.05415	0.0608701
C9JIS1	Guanine nucleotide-binding protein G(I)/G(S)/G(T) subunit beta-2 (Fragment) OS=Homo sapiens GN=GNB2 PE=1 SV=1 - [C9JIS1_HUMAN]	25.5215	7.03467	12.5	26	1	0.837795	1.48286	0.941444	1.31819	1.05693	1.10319	0.985448	1.01539	0.330987
P11215	Integrin alpha-M OS=Homo sapiens GN=ITGAM PE=1 SV=2 - [ITAM_HUMAN]	127.099	7.2251	1.3	1	1	0.842538	1.40118	0.787872	1.66852	0.678988	0.959592	0.743869	1.70387	0.0143498
B7WPN9	Probable cation-transporting ATPase 13A4 OS=Homo sapiens GN=ATP13A4 PE=3 SV=1 - [B7WPN9_HUMAN]	131.958	6.69775	1.19	2	1	0.843066	1.6147	1.36794	1.22242	0.672144	1.62728	1.61948	0.970577	0.0110372
Q8WUW7	Pyruvate kinase (Fragment) OS=Homo sapiens GN=PKM2 PE=2 SV=2 - [Q8WUW7_HUMAN]	37.2524	8.22119	9.04	9	2	0.846348	0.814562	1.35691	1.24809	0.967265	0.953853	1.1199	1.51964	0.05851
Q8WVW5	Putative uncharacterized protein (Fragment) OS=Homo sapiens PE=2 SV=1 - [Q8WVW5_HUMAN]	40.4772	6.13818	53.17	95	1	0.850421	1.08592	0.856861	1.16953	0.864181	1.06429	1.00494	1.38513	0.0368993
B4DMJ5	cDNA FLJ53012, highly similar to Tubulin beta-7 chain OS=Homo sapiens PE=2 SV=1 - [B4DMJ5_HUMAN]	27.2899	4.50049	13.22	71	2	0.852253	1.60689	1.25888	0.908063	1.04789	1.30093	1.5913	0.879913	0.0593927
B4DFN6	cDNA FLJ59866, highly similar to 2',3'-cyclic-nucleotide 3'-phosphodiesterase (EC 3.1.4.37) OS=Homo sapiens PE=2 SV=1 - [B4DFN6_HUMAN]	20.2324	8.85107	4.84	7	1	0.855521	1.71239	1.63678	0.957863	0.77078	1.40306	1.21857	1.25559	0.0798508
P23381	Tryptophan--tRNA ligase, cytoplasmic OS=Homo sapiens GN=WARS PE=1 SV=2 - [SYWC_HUMAN]	53.1316	6.22705	6.16	5	2	0.856673	1.50749	1.37326	0.811576	1.04368	1.69517	1.37238	0.876718	0.0040281
A2MYD4	V2-7 protein (Fragment) OS=Homo sapiens GN=V2-7 PE=4 SV=1 - [A2MYD4_HUMAN]	10.3459	5.0083	19.79	3	1	0.857414	0.484664	0.787062	1.45131	0.6541	0.552917	0.710215	2.44848	0.0523548
A2KBC2	Anti-(ED-B) scFV (Fragment) OS=Homo sapiens PE=2 SV=1 - [A2KBC2_HUMAN]	25.1773	7.7085	23.95	44	2	0.858212	0.694847	0.644211	1.3114	1.00315	0.699334	0.623515	1.98381	0.0423778
P78460	P21 protein (Fragment) OS=Homo sapiens GN=HRAS PE=4 SV=1 - [P78460_HUMAN]	3.18671	7.23975	36.67	21	1	0.859544	0.989454	0.935185	1.71306	0.849755	0.724741	0.63365	1.74169	0.00722624
B3KPS3	cDNA FLJ32131 fis, clone PEBLM2000267, highly similar to Tubulin alpha-ubiquitous chain OS=Homo sapiens PE=2 SV=1 - [B3KPS3_HUMAN]	46.2118	5.12256	15.14	45	5	0.861521	1.35662	1.12628	1.25556	0.976238	1.21964	1.22479	1.23132	0.0235758
F1MLW8	Uncharacterized protein OS=Bos taurus PE=4 SV=2 - [F1MLW8_BOVIN]	24.6082	5.90967	12.02	1	1	0.861725	0.432022	0.505841	1.3661	0.958679	0.755618	0.604244	2.6709	0.102898
P60903	Protein S100-A10 OS=Homo sapiens GN=S100A10 PE=1 SV=2 - [S10AA_HUMAN]	11.1955	7.37158	7.22	3	1	0.863804	0.974191	0.920608	1.55834	0.805736	0.814917	1.17226	1.72956	0.00865041
L8I3C0	Histone H4 (Fragment) OS=Bos mutus GN=M91_09398 PE=3 SV=1 - [L8I3C0_9CETA]	10.734	11.0337	22.92	28	2	0.867226	1.02372	1.59927	1.33121	0.766669	1.03473	1.51157	1.09093	0.00672989
D6RA82	Annexin OS=Homo sapiens GN=ANXA3 PE=1 SV=1 - [D6RA82_HUMAN]	32.0985	5.93506	11.97	5	3	0.868428	0.747128	1.07606	1.95594	0.833794	0.790648	1.30324	1.47979	0.0226595
P04083	Annexin A1 OS=Homo sapiens GN=ANXA1 PE=1 SV=2 - [ANXA1_HUMAN]	38.69	7.02002	31.79	6	9	0.872443	0.801508	0.803472	1.88703	0.669507	0.73251	0.903644	1.58641	0.00498381
H6VRF8	Keratin 1 OS=Homo sapiens GN=KRT1 PE=3 SV=1 - [H6VRF8_HUMAN]	66.013	8.11865	8.85	9	5	0.874635	1.43364	1.91246	1.31932	0.895342	1.08716	1.59294	0.872797	0.0730077
P06331	Ig heavy chain V-II region ARH-77 OS=Homo sapiens PE=4 SV=1 - [HV209_HUMAN]	16.2181	8.27979	17.12	7	1	0.877023	0.572583	0.977842	1.48045	0.689349	0.641012	0.726111	2.4107	0.0565099
A7E3V7	Guanine nucleotide-binding protein, beta-1 subunit (Fragment) OS=Bos taurus GN=GNB1 PE=2 SV=1 - [A7E3V7_BOVIN]	37.0059	6.17627	8.61	24	1	0.877987	1.53702	0.619119	1.50023	0.859819	1.16054	0.572216	1.61292	0.00741872
Q9UL92	Myosin-reactive immunoglobulin heavy chain variable region (Fragment) OS=Homo sapiens PE=2 SV=1 - [Q9UL92_HUMAN]	13.5716	8.42627	18.55	6	1	0.881192	0.995427	1.1152	1.52605	0.817455	0.879949	0.853398	1.67941	0.00936443
B3KRV7	cDNA FLJ34967 fis, clone NTONG2004690, highly similar to LIPOPROTEIN LIPASE (EC 3.1.1.34) OS=Homo sapiens PE=2 SV=1 - [B3KRV7_HUMAN]	51.7031	8.01611	16.49	17	6	0.884335	0.729925	1.61587	1.0554	1.15851	0.819862	1.34806	1.04557	0.0303806
B4E2S7	cDNA FLJ58780, highly similar to Homo sapiens lysosomal-associated membrane protein 2 (LAMP2), transcript variant LAMP2B, mRNA OS=Homo sapiens PE=2 SV=1 - [B4E2S7_HUMAN]	39.7868	5.66846	3.31	2	1	0.887875	2.07877	1.01585	0.955262	0.769473	1.71934	1.41746	1.12268	0.0235307
A0A087X163	Ras-related protein Rab-18 OS=Homo sapiens GN=RAB18 PE=1 SV=1 - [A0A087X163_HUMAN]	20.4072	4.99561	41.21	11	6	0.891639	1.40198	1.52047	0.91982	0.987064	1.15989	1.13082	0.71881	0.112604
M0QZN2	40S ribosomal protein S5 OS=Homo sapiens GN=RPS5 PE=1 SV=1 - [M0QZN2_HUMAN]	14.7537	8.48486	11.19	6	1	0.894769	1.8473	2.13832	0.646296	0.742765	1.94493	2.22141	0.441175	0.00020684
B8R1K3	Transferrin OS=Bos mutus grunniens PE=2 SV=1 - [B8R1K3_BOSMU]	77.6078	7.1665	4.26	5	1	0.896493	1.60718	1.12996	0.770277	1.39712	1.38299	1.245	1.03195	0.200081
D6RFL4	Monocyte differentiation antigen CD14, urinary form (Fragment) OS=Homo sapiens GN=CD14 PE=4 SV=1 - [D6RFL4_HUMAN]	23.2981	5.26221	17.37	4	2	0.899852	1.07527	1.29141	0.73297	1.26167	1.00482	1.83789	0.802698	0.106932
F5H3C5	Superoxide dismutase [Mn], mitochondrial (Fragment) OS=Homo sapiens GN=SOD2 PE=1 SV=1 - [F5H3C5_HUMAN]	12.1231	8.45557	12.61	16	1	0.908061	1.03357	1.59457	1.03548	1.18763	1.33999	1.32574	0.953559	0.175383
S6BGF5	IgG H chain OS=Homo sapiens PE=2 SV=1 - [S6BGF5_HUMAN]	25.5836	8.55811	10.42	4	2	0.91217	0.781954	1.22372	1.41398	0.840247	0.699974	1.48417	1.44982	0.00540136
B3KTV0	cDNA FLJ38781 fis, clone LIVER2000216, highly similar to HEAT SHOCK COGNATE 71 kDa PROTEIN OS=Homo sapiens PE=2 SV=1 - [B3KTV0_HUMAN]	67.9378	5.45264	14.98	92	5	0.91309	1.51204	1.23445	1.09531	1.01811	1.47806	1.00281	0.981212	0.0202676
B0YJC4	Vimentin OS=Homo sapiens GN=VIM PE=1 SV=1 - [B0YJC4_HUMAN]	49.6231	5.24951	13.69	155	5	0.91913	0.757383	0.860542	1.62804	0.805634	0.672703	0.764837	1.68938	0.000381176
Q13228	Selenium-binding protein 1 OS=Homo sapiens GN=SELENBP1 PE=1 SV=2 - [SBP1_HUMAN]	52.3576	6.3667	10.17	8	4	0.924427	1.06716	0.896236	1.36992	0.972037	1.05068	1.18591	1.25095	0.114121
S4R371	Fatty acid-binding protein, heart (Fragment) OS=Homo sapiens GN=FABP3 PE=1 SV=1 - [S4R371_HUMAN]	14.7777	6.80029	34.85	12	6	0.932173	1.00234	2.46869	0.821708	0.889227	0.932029	2.0742	0.72148	0.00151612
F1MRD0	Actin, cytoplasmic 1 OS=Bos taurus GN=ACTB PE=3 SV=2 - [F1MRD0_BOVIN]	41.8247	5.31299	48.53	61	1	0.933146	0.933338	0.860828	1.29632	1.48382	0.902087	0.839835	1.23457	0.228103
K7EL62	Guanine nucleotide-binding protein subunit alpha-11 (Fragment) OS=Homo sapiens GN=GNA11 PE=1 SV=1 - [K7EL62_HUMAN]	27.415	5.35107	22.88	12	4	0.934934	2.00274	1.13239	0.921123	1.02345	1.41126	1.35757	0.577265	0.0738677
F8VQX6	Methyltransferase-like protein 7A (Fragment) OS=Homo sapiens GN=METTL7A PE=1 SV=1 - [F8VQX6_HUMAN]	20.6486	8.104	23.33	4	3	0.938185	0.865929	0.709358	1.77973	1.13366	0.869749	0.705448	1.18804	0.086758
C9JBD3	Nucleobindin-1 (Fragment) OS=Homo sapiens GN=NUCB1 PE=1 SV=3 - [C9JBD3_HUMAN]	12.5278	6.53662	23.42	8	2	0.938559	1.59169	1.2684	0.826801	1.07994	1.31826	1.60165	0.975046	0.0619092
L8IMZ8	Poly(RC)-binding protein 1 OS=Bos mutus GN=M91_09606 PE=4 SV=1 - [L8IMZ8_9CETA]	37.4899	7.09326	7.58	22	2	0.940402	0.619239	0.798509	1.38865	0.991909	0.622594	0.935159	1.32915	0.000862965
F8WE65	Peptidyl-prolyl cis-trans isomerase OS=Homo sapiens GN=PPIA PE=1 SV=1 - [F8WE65_HUMAN]	13.0133	6.771	30	8	1	0.942185	1.28686	1.17978	1.35775	1.07079	0.8751	1.17921	1.12686	0.586338
L8HXY5	Histone H1.5 OS=Bos mutus GN=M91_12990 PE=3 SV=1 - [L8HXY5_9CETA]	22.6805	10.9165	4.87	2	1	0.943153	1.33086	1.16759	1.32598	0.888427	0.980385	1.28336	1.27568	0.149277
Q2HJH2	Ras-related protein Rab-1B OS=Bos taurus GN=RAB1B PE=2 SV=1 - [RAB1B_BOVIN]	22.1882	5.73193	31.84	147	3	0.944939	1.64666	1.44593	0.770059	1.02835	1.49229	2.23666	0.697883	0.0535497
P02647	Apolipoprotein A-I OS=Homo sapiens GN=APOA1 PE=1 SV=1 - [APOA1_HUMAN]	30.7589	5.75732	30.71	4	6	0.946067	0.972615	0.88484	0.943486	1.73675	0.913458	1.4035	0.849722	0.583554
L8IXH1	Ras-related protein Rab-2A (Fragment) OS=Bos mutus GN=M91_19590 PE=3 SV=1 - [L8IXH1_9CETA]	21.975	6.53662	21.61	17	3	0.948107	1.63007	1.23754	0.896819	0.985963	1.3228	1.38126	0.995718	0.0320021
G1DUW4	Truncated MHC class I antigen (Fragment) OS=Homo sapiens GN=HLA-A PE=4 SV=1 - [G1DUW4_HUMAN]	6.46209	5.94775	25	4149	1	0.948139	1.11906	1.23855	1.0903	1.15131	1.00405	1.16308	1.35191	0.474996
P62834	Ras-related protein Rap-1A OS=Homo sapiens GN=RAP1A PE=1 SV=1 - [RAP1A_HUMAN]	20.9737	6.66846	27.72	26	4	0.948588	1.78195	1.04148	1.02839	0.872044	1.53118	1.36909	1.04756	0.0265771
W5P684	Uncharacterized protein OS=Ovis aries GN=ACTBL2 PE=3 SV=1 - [W5P684_SHEEP]	41.8909	5.47803	25.53	10	1	0.950228	1.30592	0.902144	1.09558	1.11788	1.22221	0.971415	1.441	0.172744
W5PFC9	Uncharacterized protein (Fragment) OS=Ovis aries GN=LOC101117129 PE=4 SV=1 - [W5PFC9_SHEEP]	77.8879	6.60986	3.83	2	1	0.950602	0.912738	0.901175	1.15515	1.23932	0.98158	0.969866	1.59582	0.215024
Q6PT94	Transketolase (Fragment) OS=Bos taurus GN=TKT PE=4 SV=1 - [Q6PT94_BOVIN]	9.55077	5.87158	10.47	12	1	0.956013	0.903646	0.830146	1.49001	0.811539	0.95089	0.629621	1.92119	0.0173572
W5PPQ8	Uncharacterized protein (Fragment) OS=Ovis aries GN=IGJ PE=4 SV=1 - [W5PPQ8_SHEEP]	18.1321	6.93213	20.13	2	1	0.956558	1.76281	1.55982	0.904396	0.786505	1.55963	0.806383	1.25034	0.212083
H3BQN4	Fructose-bisphosphate aldolase OS=Homo sapiens GN=ALDOA PE=1 SV=1 - [H3BQN4_HUMAN]	39.3154	8.39697	6.09	8	2	0.958547	0.972617	0.88357	1.35773	0.944557	0.910031	1.00141	1.4768	0.00388686
Q16768	Glyceraldehyde 3-phosphate dehydrogenase (Fragment) OS=Homo sapiens GN=GAPD PE=2 SV=1 - [Q16768_HUMAN]	4.8913	5.08447	25	4	1	0.964955	0.748536	0.603946	1.69819	1.12558	0.811571	0.604084	1.5654	0.000686695
P60763	Ras-related C3 botulinum toxin substrate 3 OS=Homo sapiens GN=RAC3 PE=1 SV=1 - [RAC3_HUMAN]	21.3651	8.14795	14.58	8	2	0.972702	1.61656	1.15647	0.997536	0.999216	1.53121	1.2028	1.17933	0.00491317
A4IF97	Myosin regulatory light chain 12B OS=Bos taurus GN=MYL12B PE=2 SV=1 - [ML12B_BOVIN]	19.6795	4.84326	6.43	11	1	0.973851	1.21376	0.911171	1.20228	1.12377	1.00375	1.03339	1.42193	0.188217
H3BMH2	Ras-related protein Rab-11A (Fragment) OS=Homo sapiens GN=RAB11A PE=3 SV=1 - [H3BMH2_HUMAN]	17.6571	8.33838	8.39	11	1	0.977852	1.62466	1.2877	0.96849	1.37177	1.29914	0.75541	0.82488	0.307321
H7C3P7	Ras-related protein Ral-A (Fragment) OS=Homo sapiens GN=RALA PE=1 SV=1 - [H7C3P7_HUMAN]	18.359	4.70361	7.93	4	1	0.982698	1.30832	1.0242	1.04446	1.21463	1.34613	0.985777	1.16079	0.097379
X6R3G6	Lactadherin OS=Homo sapiens GN=MFGE8 PE=4 SV=1 - [X6R3G6_HUMAN]	37.4808	8.14795	66.57	3	1	0.985388	0.615899	0.517942	1.33311	1.37019	0.660901	0.587255	1.53147	0.0124286
G3N2D7	Uncharacterized protein (Fragment) OS=Bos taurus GN=IGLL1 PE=4 SV=1 - [G3N2D7_BOVIN]	12.1048	4.77979	12.93	1	1	0.990771	2.12586	0.961263	0.974815	0.694131	1.83743	0.763292	0.940291	0.00560398
P08133	Annexin A6 OS=Homo sapiens GN=ANXA6 PE=1 SV=3 - [ANXA6_HUMAN]	75.8256	5.60498	12.63	12	8	0.993624	0.684672	0.852853	1.29775	1.36749	0.672538	0.87758	0.894346	0.178247
Q9UL83	Myosin-reactive immunoglobulin light chain variable region (Fragment) OS=Homo sapiens PE=1 SV=1 - [Q9UL83_HUMAN]	11.8268	8.67529	16.67	2	1	0.996804	0.780549	0.806916	1.37	0.927295	0.73254	0.661179	1.91845	0.030906
P01606	Ig kappa chain V-I region OU OS=Homo sapiens PE=1 SV=1 - [KV114_HUMAN]	11.7697	9.90576	16.67	17	1	1	0.884173	0.843028	1.18048	1.02231	1.17841	0.782696	1.72668	0.158891
A0A024R1Y2	ATP citrate lyase, isoform CRA_a OS=Homo sapiens GN=ACLY PE=4 SV=1 - [A0A024R1Y2_HUMAN]	119.695	7.32764	3.02	6	3	1.00328	1.12949	1.00318	1.03347	0.960307	0.833312	0.953818	1.11429	0.790102
E9PQB7	Cofilin-1 (Fragment) OS=Homo sapiens GN=CFL1 PE=1 SV=1 - [E9PQB7_HUMAN]	13.9143	8.71924	44.26	13	6	1.00601	1.19109	1.11823	1.1427	1.06133	1.16161	1.10987	0.944544	0.313911
H0YCR7	Ribonuclease inhibitor (Fragment) OS=Homo sapiens GN=RNH1 PE=1 SV=1 - [H0YCR7_HUMAN]	30.43	6.3667	10.18	3	2	1.00812	1.11772	0.911294	1.35782	0.913274	1.00202	0.880878	1.54726	0.00986743
L8IGW7	T-complex protein 1 subunit beta (Fragment) OS=Bos mutus GN=M91_03809 PE=3 SV=1 - [L8IGW7_9CETA]	10.2795	6.06201	11.22	6	1	1.00844	0.970193	0.943036	1.39379	1.23847	1.01434	0.918846	1.12781	0.178713
L8I855	Adipocyte plasma membrane-associated protein (Fragment) OS=Bos mutus GN=M91_08405 PE=4 SV=1 - [L8I855_9CETA]	31.009	7.48877	3.3	5	1	1.00868	0.802058	1.54603	0.886532	1.57179	0.743867	2.40498	0.601995	0.0850774
P61586	Transforming protein RhoA OS=Homo sapiens GN=RHOA PE=1 SV=1 - [RHOA_HUMAN]	21.7541	6.1001	25.39	19	2	1.02016	0.94408	0.849694	1.40622	1.03403	0.987767	0.826188	1.43062	3.47603e-05
L8J3H9	14-3-3 protein zeta/delta (Fragment) OS=Bos mutus GN=M91_19634 PE=4 SV=1 - [L8J3H9_9CETA]	26.1672	5.05908	22.17	42	3	1.02111	1.44194	1.04282	1.28343	1.00272	1.16692	1.14417	1.02759	0.320239
P01024	Complement C3 OS=Homo sapiens GN=C3 PE=1 SV=2 - [CO3_HUMAN]	187.03	6.40479	6.92	5	8	1.02117	0.916921	0.815888	1.2156	1.03285	0.904453	0.97055	1.42353	0.0286489
A0A087WWV8	Protein IGKV1-8 OS=Homo sapiens GN=IGKV1-8 PE=4 SV=1 - [A0A087WWV8_HUMAN]	25.5547	8.49951	43.16	16	1	1.02128	1.26699	1.6142	0.919582	1.10935	1.05342	1.75762	0.895448	0.00493626
F5H157	Ras-related protein Rab-35 (Fragment) OS=Homo sapiens GN=RAB35 PE=1 SV=1 - [F5H157_HUMAN]	21.2009	8.30908	20	122	1	1.02223	1.47122	1.95739	0.735547	1.00699	1.46844	1.73655	0.653775	0.000590484
H0YLY7	Calcineurin B homologous protein 1 (Fragment) OS=Homo sapiens GN=CHP1 PE=1 SV=1 - [H0YLY7_HUMAN]	10.7354	5.2749	6.59	6	1	1.02646	1.28471	1.77235	0.719278	1.68138	1.00872	1.35049	0.489177	0.120275
H7C3Z9	Anterior gradient protein 2 homolog (Fragment) OS=Homo sapiens GN=AGR2 PE=4 SV=1 - [H7C3Z9_HUMAN]	13.4876	6.354	14.29	10	1	1.02882	1.11528	1.12768	0.61971	1.61669	1.6167	1.84441	0.630214	0.232373
B2R5H0	Protein S100 OS=Homo sapiens PE=2 SV=1 - [B2R5H0_HUMAN]	11.7168	7.18115	23.81	2	2	1.02961	0.342641	0.619481	2.05865	0.811557	0.624154	0.473673	1.69725	0.00519298
Q96QR1	Secretoglobin family 3A member 1 OS=Homo sapiens GN=SCGB3A1 PE=1 SV=2 - [SG3A1_HUMAN]	10.0936	8.32373	13.46	1	1	1.03422	0.614393	0.926005	1.62453	0.99521	0.702004	0.967404	1.42729	0.00176641
L8IUW5	Guanine nucleotide-binding protein G(I) subunit alpha-2 (Fragment) OS=Bos mutus GN=M91_12464 PE=4 SV=1 - [L8IUW5_9CETA]	37.5447	5.60498	14.94	57	3	1.03456	1.12629	1.02103	1.4697	0.959654	1.04371	0.808874	1.16897	0.139642
A6QNW7	CD5L protein OS=Bos taurus GN=CD5L PE=2 SV=1 - [A6QNW7_BOVIN]	50.1791	5.38916	2	2	1	1.0372	2.04577	0.905504	0.999755	0.970403	1.66135	0.687126	1.02095	0.00911033
A0A075B730	Epiplakin OS=Homo sapiens GN=EPPK1 PE=1 SV=2 - [A0A075B730_HUMAN]	552.791	5.60498	3.24	5	2	1.03969	1.19687	0.986073	1.15943	0.921666	1.14753	1.03723	1.31898	0.0647787
Q9BY74	Ribosomal protein L7a (Fragment) OS=Homo sapiens GN=RP-L7a PE=2 SV=1 - [Q9BY74_HUMAN]	15.6267	10.0376	9.15	8	1	1.04012	1.32139	1.48324	0.94749	0.890254	1.23519	1.48704	1.17013	0.0214373
A4FUA8	F-actin-capping protein subunit alpha-1 OS=Bos taurus GN=CAPZA1 PE=2 SV=1 - [CAZA1_BOVIN]	32.9113	5.8208	6.29	5	1	1.04517	1.14035	1.42355	1.08554	1.06284	1.02563	1.26125	1.13443	0.0497958
A0RZG6	Endoplasmic reticulum chaperone (Fragment) OS=Homo sapiens GN=SIL1 PE=2 SV=1 - [A0RZG6_HUMAN]	8.40641	4.65283	16.46	7	1	1.04841	1.12327	1.19515	0.965175	1.08425	1.04707	1.67948	1.23558	0.323174
B4DI70	cDNA FLJ53509, highly similar to Galectin-3-binding protein OS=Homo sapiens PE=2 SV=1 - [B4DI70_HUMAN]	46.3911	5.26221	7.26	6	2	1.05702	0.86692	1.06998	1.0724	1.18523	0.853227	1.4329	1.14836	0.174471
E7EU05	Platelet glycoprotein 4 (Fragment) OS=Homo sapiens GN=CD36 PE=4 SV=2 - [E7EU05_HUMAN]	52.0287	7.25439	16.41	18	5	1.0659	1.15619	1.01862	0.966087	1.10139	1.04279	1.07476	0.969739	0.146068
A0A024R1H1	Selenoprotein M OS=Homo sapiens GN=SELM PE=4 SV=1 - [A0A024R1H1_HUMAN]	8.42027	4.70361	18.92	6	1	1.06629	0.615914	1.05403	0.652631	1.16605	1.71281	3.06562	0.884395	0.510048
P04839	Cytochrome b-245 heavy chain OS=Homo sapiens GN=CYBB PE=1 SV=2 - [CY24B_HUMAN]	65.2936	8.63135	4.21	2	2	1.07368	0.867307	0.843667	1.44818	0.971888	1.0162	1.21247	1.31016	0.143003
H7C2Z6	Grancalcin (Fragment) OS=Homo sapiens GN=GCA PE=1 SV=1 - [H7C2Z6_HUMAN]	16.8111	6.66846	8.22	7	1	1.07447	0.786252	1.03169	1.46652	0.937011	0.759437	1.53282	1.28362	0.109406
B4DDZ4	Annexin OS=Homo sapiens PE=2 SV=1 - [B4DDZ4_HUMAN]	33.5928	5.85889	20.74	11	4	1.07562	0.912126	0.926432	1.32541	1.04585	0.894821	0.970348	1.33071	9.61324e-05
B3KS49	cDNA FLJ35478 fis, clone SMINT2007796, highly similar to Gelsolin OS=Homo sapiens PE=2 SV=1 - [B3KS49_HUMAN]	52.3103	5.49072	8.66	19	4	1.07648	0.928642	1.02239	1.0172	1.11298	0.812475	1.16057	1.12243	0.101605
Q68DS2	Putative uncharacterized protein DKFZp779M0222 (Fragment) OS=Homo sapiens GN=DKFZp779M0222 PE=2 SV=1 - [Q68DS2_HUMAN]	22.9917	7.29834	4.76	4	1	1.08678	0.665912	0.613159	1.42564	1.25153	0.795295	0.749209	1.57454	0.00369824
B4DJB0	cDNA FLJ60092, highly similar to 14-3-3 protein epsilon (14-3-3E) OS=Homo sapiens PE=2 SV=1 - [B4DJB0_HUMAN]	15.9171	5.71924	20.86	1	1	1.08733	1.65199	0.925891	1.04854	1.11133	1.12679	1.01753	1.12886	0.297578
Q9Y509	VH3 protein (Fragment) OS=Homo sapiens GN=VH3 PE=1 SV=1 - [Q9Y509_HUMAN]	15.7587	8.38232	15.65	1	1	1.08854	0.740594	0.725943	1.17423	1.29488	0.805745	0.55606	1.51969	0.0286717
P35579	Myosin-9 OS=Homo sapiens GN=MYH9 PE=1 SV=4 - [MYH9_HUMAN]	226.392	5.60498	15.82	27	23	1.09315	0.874556	0.898959	1.34546	0.977459	0.833096	0.896361	1.27999	0.00245228
C9J7D1	Ras-related protein Rab-7a OS=Homo sapiens GN=RAB7A PE=1 SV=1 - [C9J7D1_HUMAN]	10.2462	7.92822	12.09	11	1	1.09802	1.16513	1.03449	1.02281	1.24206	1.08347	0.885068	1.27668	0.392169
B4E1V0	cDNA FLJ54839, highly similar to Lactotransferrin (EC 3.4.21.-) OS=Homo sapiens PE=2 SV=1 - [B4E1V0_HUMAN]	33.0041	7.63525	71.33	2	1	1.10335	1.47836	1.04749	1.01879	1.48207	1.08441	0.828365	0.838515	0.293034
A0A024R1F4	HCG2010666, isoform CRA_a OS=Homo sapiens GN=hCG_2010666 PE=4 SV=1 - [A0A024R1F4_HUMAN]	61.3578	7.12256	7.91	4	3	1.10543	0.895254	1.09396	1.49857	1.14692	0.834458	1.0099	1.18646	0.0633042
V9GYG9	Apolipoprotein A-II (Fragment) OS=Homo sapiens GN=APOA2 PE=1 SV=1 - [V9GYG9_HUMAN]	10.6426	6.62451	29.47	5	2	1.10747	0.988945	0.836509	0.482719	1.60657	1.1148	1.08745	0.517456	0.0563713
A8K477	Sulfhydryl oxidase OS=Homo sapiens PE=2 SV=1 - [A8K477_HUMAN]	66.7683	8.60205	13.74	8	5	1.10849	1.14063	1.21792	0.751585	1.7633	1.11761	1.08193	0.776873	0.180383
B4DXS4	cDNA FLJ57227, highly similar to Isocitrate dehydrogenase OS=Homo sapiens PE=2 SV=1 - [B4DXS4_HUMAN]	26.6532	6.69775	3.83	12	1	1.10918	1.31043	1.03906	0.82378	1.38155	1.2441	1.17317	1.02398	0.155676
A0A087WVJ0	Mucin-1 (Fragment) OS=Homo sapiens GN=MUC1 PE=4 SV=1 - [A0A087WVJ0_HUMAN]	25.5498	6.7124	21.93	28	4	1.11127	0.866575	0.821801	1.11248	1.61866	0.859574	0.722011	0.944764	0.119686
P10909	Clusterin OS=Homo sapiens GN=CLU PE=1 SV=1 - [CLUS_HUMAN]	52.461	6.26514	27.62	13	10	1.11363	0.871519	0.894955	1.38426	1.39641	0.789838	0.94295	1.01772	0.151026
A0A088QFM6	Heat shock protein 90kDa alpha OS=Bos mutus grunniens PE=2 SV=1 - [A0A088QFM6_BOSMU]	83.3111	5.05908	12.6	22	5	1.11438	1.0108	0.88981	1.03816	1.09964	1.14861	0.86439	0.984367	0.0412774
Q96HX3	Dolichyl-diphosphooligosaccharide--protein glycosyltransferase subunit 1 (Fragment) OS=Homo sapiens PE=2 SV=1 - [Q96HX3_HUMAN]	64.5417	6.55127	10.56	10	5	1.12055	0.918197	1.1058	0.940581	1.05702	0.997197	1.40683	0.806963	0.117079
P04004	Vitronectin OS=Homo sapiens GN=VTN PE=1 SV=1 - [VTNC_HUMAN]	54.2712	5.79541	14.23	3	5	1.12089	0.825062	0.836815	1.00025	1.19979	0.800683	0.800475	1.03887	0.00140655
A0A0A0MSI0	Peroxiredoxin-1 (Fragment) OS=Homo sapiens GN=PRDX1 PE=4 SV=1 - [A0A0A0MSI0_HUMAN]	18.9637	6.91748	18.71	5	3	1.12271	0.789442	0.988336	1.42048	0.880247	0.834303	0.850908	1.18057	0.0741796
Q14697	Neutral alpha-glucosidase AB OS=Homo sapiens GN=GANAB PE=1 SV=3 - [GANAB_HUMAN]	106.807	6.13818	6.46	8	5	1.12322	1.0542	1.01711	1.08738	1.01716	1.11425	0.907074	1.26743	0.243535
J3QR64	Eukaryotic initiation factor 4A-I (Fragment) OS=Homo sapiens GN=EIF4A1 PE=1 SV=1 - [J3QR64_HUMAN]	23.756	6.53662	7.48	15	2	1.12445	0.907408	0.999552	1.18709	1.13354	1.05043	1.13295	1.2528	0.111676
L8IDW8	ERO1-like protein alpha (Fragment) OS=Bos mutus GN=M91_04808 PE=4 SV=1 - [L8IDW8_9CETA]	50.9716	6.7417	1.61	4	1	1.12534	1.04673	0.912323	1.09285	1.22269	1.05703	0.903516	1.33079	0.0888864
Q13707	ACTA2 protein (Fragment) OS=Homo sapiens GN=ACTA2 PE=3 SV=1 - [Q13707_HUMAN]	36.7832	5.35107	26.67	7	1	1.12639	0.99765	0.899621	1.20319	1.08859	0.960014	0.823294	1.49418	0.0407424
B2R6J2	cDNA, FLJ92973, highly similar to Homo sapiens villin 2 (ezrin) (VIL2), mRNA OS=Homo sapiens PE=2 SV=1 - [B2R6J2_HUMAN]	69.3577	6.26514	3.92	8	2	1.1279	0.852025	1.3533	1.20587	1.17295	0.762702	0.806853	1.15036	0.348242
F8WCJ1	Eukaryotic translation initiation factor 5A-2 OS=Homo sapiens GN=EIF5A2 PE=1 SV=1 - [F8WCJ1_HUMAN]	11.6799	9.14404	11.43	11	1	1.13157	1.41742	1.24327	0.912274	1.29451	0.860044	1.24225	0.664765	0.293104
Q5FWY2	GNAS complex locus OS=Homo sapiens GN=GNAS PE=2 SV=2 - [Q5FWY2_HUMAN]	44.2223	6.29053	6.32	41	1	1.13206	1.04308	0.676605	1.47687	0.97778	0.783257	0.71886	1.55134	0.00761297
H0YI37	ATP synthase subunit beta, mitochondrial (Fragment) OS=Homo sapiens GN=ATP5B PE=1 SV=1 - [H0YI37_HUMAN]	13.8981	5.8208	9.77	10	1	1.13758	1.35677	1.2614	1.0483	1.49111	1.30326	0.620603	0.503347	0.351363
A1L407	Histone cluster 1, H1t OS=Homo sapiens GN=HIST1H1T PE=2 SV=1 - [A1L407_HUMAN]	22.0197	11.7222	5.31	17	1	1.1425	0.623007	0.855278	1.28145	1.22522	0.842145	0.999876	1.44138	0.0177537
P07355	Annexin A2 OS=Homo sapiens GN=ANXA2 PE=1 SV=2 - [ANXA2_HUMAN]	38.5798	7.75244	30.68	29	9	1.14326	1.08447	0.963333	1.14824	0.968916	1.1098	0.7463	1.28784	0.117625
B4DWK8	Catalase OS=Homo sapiens PE=2 SV=1 - [B4DWK8_HUMAN]	53.2535	7.94287	7.49	2	3	1.152	0.816334	0.900887	1.0949	1.26447	1.23335	0.846398	1.16069	0.300201
B3KQT9	Protein disulfide-isomerase OS=Homo sapiens PE=2 SV=1 - [B3KQT9_HUMAN]	54.0685	7.21045	27.29	7	2	1.15482	1.39657	1.30249	0.680453	1.1597	1.22707	1.8341	0.688364	0.0443751
B3KUD3	cDNA FLJ39583 fis, clone SKMUS2004897, highly similar to ACTIN, ALPHA SKELETAL MUSCLE OS=Homo sapiens PE=2 SV=1 - [B3KUD3_HUMAN]	37.7999	5.73193	29.53	38	1	1.15597	1.49456	1.02862	0.973374	1.06174	1.36873	1.52412	0.776351	0.162007
B2R761	cDNA, FLJ93299, highly similar to Homo sapiens sterol carrier protein 2 (SCP2), mRNA OS=Homo sapiens PE=2 SV=1 - [B2R761_HUMAN]	58.9837	7.04932	5.3	8	3	1.15626	0.860868	0.832765	0.888617	1.59261	0.93944	0.801141	1.09951	0.106627
B3KMA6	cDNA FLJ10609 fis, clone NT2RP2005276, highly similar to Long-chain-fatty-acid--CoA ligase 3 (EC 6.2.1.3) OS=Homo sapiens PE=2 SV=1 - [B3KMA6_HUMAN]	51.273	7.28369	8.39	16	3	1.15749	1.12549	0.930037	1.36319	1.07359	0.905144	0.980751	0.972695	0.599598
F6KPG5	Albumin (Fragment) OS=Homo sapiens PE=2 SV=1 - [F6KPG5_HUMAN]	66.488	6.03662	37.44	14	18	1.15751	0.777998	0.791282	1.37501	1.28417	0.783181	0.839392	0.992552	0.0697131
F2WW53	Catechol-O-methyltransferase (Fragment) OS=Homo sapiens GN=COMT PE=4 SV=1 - [F2WW53_HUMAN]	3.01658	6.45557	59.26	8	1	1.15911	1.27661	0.893281	0.90793	1.35215	1.2048	0.995168	1.09681	0.0855243
H3BLU7	Aflatoxin B1 aldehyde reductase member 2 (Fragment) OS=Homo sapiens GN=AKR7A2 PE=1 SV=1 - [H3BLU7_HUMAN]	34.6622	7.18115	4.78	3	1	1.15968	1.41859	1.32465	0.80319	1.10798	1.44978	1.80723	0.669345	0.0326789
P30040	Endoplasmic reticulum resident protein 29 OS=Homo sapiens GN=ERP29 PE=1 SV=4 - [ERP29_HUMAN]	28.9752	7.31299	14.18	6	3	1.16046	0.93595	0.7889	0.976862	1.55569	0.886044	0.93254	1.0495	0.0947081
B4DQC5	cDNA FLJ58039, highly similar to Golgi-associated plant pathogenesis-related protein 1 OS=Homo sapiens PE=2 SV=1 - [B4DQC5_HUMAN]	14.424	8.00146	29.46	8	3	1.16301	0.654714	0.790537	1.39092	1.20551	0.770165	0.737657	1.37268	0.000374859
P07737	Profilin-1 OS=Homo sapiens GN=PFN1 PE=1 SV=2 - [PROF1_HUMAN]	15.0446	8.26514	21.43	2	2	1.1693	0.815575	0.824856	1.33047	1.12078	0.835218	0.907745	1.17756	0.00636914
P05164	Myeloperoxidase OS=Homo sapiens GN=MPO PE=1 SV=1 - [PERM_HUMAN]	83.8148	8.96826	5.64	6	4	1.16936	0.892207	1.13784	1.33675	0.746826	0.997826	1.10944	1.33416	0.173138
B7ZAH9	cDNA, FLJ79193, highly similar to Beta-1,4-galactosyltransferase 1 (EC 2.4.1.-) OS=Homo sapiens PE=2 SV=1 - [B7ZAH9_HUMAN]	29.9571	8.60205	8.91	4	2	1.17129	0.649187	0.598543	1.44188	1.33133	0.595121	0.898453	0.947499	0.0934907
Q08ES8	Cell growth-inhibiting protein 34 OS=Homo sapiens PE=2 SV=1 - [Q08ES8_HUMAN]	20.0816	9.59814	5.08	4	1	1.17672	0.794856	1.04857	0.859457	1.8493	0.875404	1.09866	0.836635	0.130224
Q6ZWF8	cDNA FLJ41169 fis, clone BRACE2041200, highly similar to PROTEIN-ARGININE DEIMINASE TYPE II (EC 3.5.3.15) OS=Homo sapiens PE=2 SV=1 - [Q6ZWF8_HUMAN]	24.1482	6.771	7.98	5	1	1.17869	1.47823	1.05053	0.923244	1.0185	1.09038	1.75818	1.00821	0.520927
B9EJA8	Mannose receptor, C type 1-like 1 OS=Homo sapiens GN=MRC1L1 PE=2 SV=1 - [B9EJA8_HUMAN]	165.918	6.50732	2.47	6	3	1.17908	0.961535	0.858481	0.956196	1.57967	1.09035	1.03519	1.01831	0.159048
L8HT14	Uncharacterized protein OS=Bos mutus GN=M91_21668 PE=4 SV=1 - [L8HT14_9CETA]	11.2941	10.5356	15.15	6	1	1.17956	1.39125	1.27557	0.874178	0.988005	1.30026	1.6027	0.938568	0.0568806
Q2HJ20	Sclerostin domain containing 1 OS=Bos taurus GN=SOSTDC1 PE=2 SV=1 - [Q2HJ20_BOVIN]	23.1286	9.77393	5.34	4	1	1.18276	0.943643	1.60702	1.10245	0.954119	1.17174	1.21417	0.964325	0.278238
K7ERZ3	Perilipin-3 (Fragment) OS=Homo sapiens GN=PLIN3 PE=1 SV=1 - [K7ERZ3_HUMAN]	31.9632	5.13525	38.7	4	7	1.18635	0.996284	1.02212	0.944838	1.15958	1.07194	1.08108	1.0434	0.0809953
B6VAP7	CDC42 protein OS=Bos taurus GN=CDC42 PE=2 SV=1 - [B6VAP7_BOVIN]	21.2299	5.66846	21.47	10	2	1.18659	1.89824	1.14587	0.742155	1.22047	1.68593	1.54052	0.65957	0.0114806
C9J3L8	Translocon-associated protein subunit alpha OS=Homo sapiens GN=SSR1 PE=1 SV=1 - [C9J3L8_HUMAN]	29.5548	4.29736	21.51	11	4	1.19045	1.12283	0.981654	0.93444	1.00902	0.978818	1.26594	1.00441	0.683734
F1MLB8	ATP synthase subunit alpha OS=Bos taurus GN=ATP5A1 PE=1 SV=1 - [F1MLB8_BOVIN]	59.6527	9.18799	13.74	13	5	1.19274	0.818383	0.901093	1.03424	1.07943	0.865617	0.974815	1.24726	0.0690583
A0A087WYS1	UTP--glucose-1-phosphate uridylyltransferase OS=Homo sapiens GN=UGP2 PE=1 SV=1 - [A0A087WYS1_HUMAN]	56.9318	7.88428	23.62	20	10	1.19322	0.864289	1.02996	1.15077	1.27646	0.863546	1.21295	0.97882	0.0663561
O00763	Acetyl-CoA carboxylase 2 OS=Homo sapiens GN=ACACB PE=1 SV=3 - [ACACB_HUMAN]	276.365	6.49365	1.51	1	3	1.19626	1	0.960541	0.960976	1.3235	1.10153	1.22077	0.981659	0.198096
B4E2M0	cDNA FLJ55443, highly similar to Ras GTPase-activating-like protein IQGAP1 OS=Homo sapiens PE=2 SV=1 - [B4E2M0_HUMAN]	124.546	8.47021	1.75	17	2	1.20278	1.14425	0.939783	1.26194	0.862595	1.08087	1.00012	1.32015	0.204009
P62330	ADP-ribosylation factor 6 OS=Homo sapiens GN=ARF6 PE=1 SV=2 - [ARF6_HUMAN]	20.0694	8.95361	5.71	7	1	1.20309	1.32044	1.00423	0.863534	1.39697	1.28036	0.899284	0.920783	0.0130079
P05141	ADP/ATP translocase 2 OS=Homo sapiens GN=SLC25A5 PE=1 SV=7 - [ADT2_HUMAN]	32.8312	9.68604	11.41	26	3	1.20605	1.1464	1.01094	0.994897	0.942705	1.05834	0.970832	0.925275	0.527179
Q9HCC1	Single chain Fv (Fragment) OS=Homo sapiens PE=1 SV=1 - [Q9HCC1_HUMAN]	12.235	8.47021	26.79	15	1	1.20663	0.927026	1.01052	1.15061	1.2789	0.934358	1.0153	1.09567	0.00244798
E9PKG6	Nucleobindin-2 OS=Homo sapiens GN=NUCB2 PE=1 SV=2 - [E9PKG6_HUMAN]	40.3433	5.17334	10.95	13	3	1.20935	1.35827	1.01341	0.854649	1.24048	1.22503	1.07023	0.983407	0.0180105
W5Q3Y4	Calcium-transporting ATPase OS=Ovis aries GN=ATP2A2 PE=3 SV=1 - [W5Q3Y4_SHEEP]	106.546	5.35107	2.58	16	2	1.21046	1.17067	1.00558	0.970017	1.20213	1.11967	1.02591	0.99722	0.00143997
F8VU90	Peptidyl-prolyl cis-trans isomerase OS=Homo sapiens GN=FKBP11 PE=1 SV=1 - [F8VU90_HUMAN]	19.8015	6.99072	11.54	8	2	1.21261	1.05007	1.15525	1.04943	1.19009	1.05043	1.26978	0.925671	0.0465465
Q5VUC0	S-acyl fatty acid synthase thioesterase, medium chain OS=Homo sapiens GN=OLAH PE=4 SV=1 - [Q5VUC0_HUMAN]	15.6299	7.00537	10.95	4	1	1.21388	1.07992	1.25391	0.748947	1.168	1.30309	1.64159	1	0.138204
Q15181	Inorganic pyrophosphatase OS=Homo sapiens GN=PPA1 PE=1 SV=2 - [IPYR_HUMAN]	32.6392	5.85889	2.77	1	1	1.2164	0.636036	0.669223	1.10865	1.69402	0.717482	0.564111	1.30769	0.0278515
D3DP13	Fibrinogen beta chain, isoform CRA_e OS=Homo sapiens GN=FGB PE=4 SV=1 - [D3DP13_HUMAN]	39.7109	7.29834	15.41	4	4	1.21682	0.873805	0.84495	0.840852	1.61547	0.952771	0.84514	0.82258	0.0404204
B7Z556	cDNA FLJ56822, highly similar to Alpha-2-HS-glycoprotein OS=Homo sapiens PE=2 SV=1 - [B7Z556_HUMAN]	27.3369	6.52197	13.06	4	1	1.21829	1.74097	1.50021	0.799904	1.28905	1.03143		1.08647	0.450992
F1MPU0	Clathrin heavy chain 1 (Fragment) OS=Bos taurus GN=CLTC PE=1 SV=2 - [F1MPU0_BOVIN]	189.817	5.63037	8.37	9	11	1.22361	0.852766	0.908055	1.00684	1.15881	0.952342	0.967508	1.11162	0.0268615
I3L1H9	Zymogen granule protein 16 homolog B (Fragment) OS=Homo sapiens GN=ZG16B PE=4 SV=1 - [I3L1H9_HUMAN]	7.47488	9.31982	24.64	4	2	1.22833	0.528095	0.496329	1.93192	0.79436	0.582751	0.678798	1.38473	0.0358979
P01008	Antithrombin-III OS=Homo sapiens GN=SERPINC1 PE=1 SV=1 - [ANT3_HUMAN]	52.5689	6.7124	4.31	6	2	1.23073	0.981807	0.957179	0.871036	1.73961	0.904734	0.780921	0.83471	0.0800133
H7C3T4	Peroxiredoxin-4 (Fragment) OS=Homo sapiens GN=PRDX4 PE=1 SV=1 - [H7C3T4_HUMAN]	18.3133	6.18896	13.04	4	2	1.236	1.15618	0.910185	0.974161	1.27307	1.02495	0.764511	1.24892	0.100522
A0A087X054	Hypoxia up-regulated protein 1 OS=Homo sapiens GN=HYOU1 PE=1 SV=1 - [A0A087X054_HUMAN]	104.713	5.71924	6.4	17	4	1.24212	1.00941	0.805258	1.10076	1.24105	0.86051	0.758663	1.1142	0.00431665
P51571	Translocon-associated protein subunit delta OS=Homo sapiens GN=SSR4 PE=1 SV=1 - [SSRD_HUMAN]	18.9866	6.15088	13.87	1	2	1.24315	0.864231	0.868678	0.985024	1.44971	0.948804	1.04834	1.05504	0.0432992
F5GXS0	Complement C4-B OS=Homo sapiens GN=C4B PE=4 SV=1 - [F5GXS0_HUMAN]	187.552	7.32764	10.6	10	16	1.24714	0.849608	0.993469	0.918576	1.39885	0.904719	1.02706	0.912233	0.00508493
A0A024R3J7	HCG2032701, isoform CRA_a OS=Homo sapiens GN=hCG_2032701 PE=4 SV=1 - [A0A024R3J7_HUMAN]	80.3757	7.81104	4.13	2	3	1.24875	0.964363	1.20252	1.04844	1.14746	1.06223	1.30228	0.995369	0.0423479
W5PMM7	Protein disulfide-isomerase (Fragment) OS=Ovis aries GN=PDIA3 PE=3 SV=1 - [W5PMM7_SHEEP]	50.8777	6.99072	22.94	5	1	1.25169	1.06909	0.829247	0.928556	1.49124	0.921068	0.903565	1.05591	0.0399668
E5RHW4	Erlin-2 (Fragment) OS=Homo sapiens GN=ERLIN2 PE=1 SV=1 - [E5RHW4_HUMAN]	37.7014	5.61768	13.02	13	3	1.25257	1.20335	0.850783	0.765982	1.24071	1.14216	1.75458	0.867571	0.50777
F5H747	Polyubiquitin-C (Fragment) OS=Homo sapiens GN=UBC PE=1 SV=3 - [F5H747_HUMAN]	18.1628	8.32373	33.54	57	3	1.25282	1.6745	1.01501	1.09189	0.970066	1.32347	0.914869	0.842111	0.120189
A0A024R9A1	RAB7B, member RAS oncogene family, isoform CRA_a OS=Homo sapiens GN=RAB7B PE=4 SV=1 - [A0A024R9A1_HUMAN]	15.8854	8.104	7.04	3	1	1.25406	1.07125	1.30627	1.08339	1.43711	0.660928	1.20178	0.720787	0.176426
B4DS71	cDNA FLJ57081, moderately similar to WD repeat protein 1 OS=Homo sapiens PE=2 SV=1 - [B4DS71_HUMAN]	22.4095	9.71533	7.69	9	1	1.257	1.02	0.644927	1.10731	1.49348	0.89043	0.758205	1.12896	0.0123068
P11021	78 kDa glucose-regulated protein OS=Homo sapiens GN=HSPA5 PE=1 SV=2 - [GRP78_HUMAN]	72.2884	5.16064	37.16	70	17	1.26109	0.857481	0.911802	0.826531	1.42897	0.94443	0.954019	0.906941	0.00848614
B2R679	cDNA, FLJ92825, highly similar to Homo sapiens SAR1a gene homolog 1 (S. cerevisiae) (SARA1), mRNA OS=Homo sapiens PE=2 SV=1 - [B2R679_HUMAN]	22.2805	7.03467	11.62	16	2	1.26686	1.25131	1.00923	0.967921	1.36124	0.859331	0.812977	0.947745	0.191806
D6RC73	C-C motif chemokine 28 OS=Homo sapiens GN=CCL28 PE=4 SV=1 - [D6RC73_HUMAN]	9.25179	10.4917	18.75	6	1	1.26933	1.03654	1.16885	0.857328	1.36346	1.0108	1.41903	0.887385	0.0241845
Q15084	Protein disulfide-isomerase A6 OS=Homo sapiens GN=PDIA6 PE=1 SV=1 - [PDIA6_HUMAN]	48.0913	5.08447	22.73	5	6	1.27127	0.969403	1.1632	0.769515	1.09446	1.22226	1.89975	0.913526	0.259679
C5IJ98	RAB5A OS=Ovis aries PE=2 SV=1 - [C5IJ98_SHEEP]	23.6489	8.14795	11.63	18	1	1.27286	0.832748	0.842962	1.07579	1.34584	0.964245	0.922594	1.19901	0.0118927
E9PNW4	CD59 glycoprotein OS=Homo sapiens GN=CD59 PE=1 SV=1 - [E9PNW4_HUMAN]	11.9765	5.74463	27.78	4	3	1.27579	0.876593	0.748443	1.39262	1.05476	0.773141	0.634447	1.08905	0.0476611
G3V2X9	Alpha-actinin-1 (Fragment) OS=Homo sapiens GN=ACTN1 PE=1 SV=1 - [G3V2X9_HUMAN]	16.3038	9.26123	7.64	12	1	1.27799	1.08382	1.10202	1.11466	1.12866	0.86815	1.26639	1.01554	0.299484
P13639	Elongation factor 2 OS=Homo sapiens GN=EEF2 PE=1 SV=4 - [EF2_HUMAN]	95.277	6.82959	10.02	11	7	1.28007	1.06938	1.00045	1.1111	1.09026	1.0902	1.04532	1.0242	0.314672
L8HNU8	Protein ERGIC-53 (Fragment) OS=Bos mutus GN=M91_18504 PE=4 SV=1 - [L8HNU8_9CETA]	52.8343	6.1001	5.39	8	2	1.28275	0.952268	1.06756	1.03141	1.13622	0.890621	1.27402	1.10369	0.122744
P13667	Protein disulfide-isomerase A4 OS=Homo sapiens GN=PDIA4 PE=1 SV=2 - [PDIA4_HUMAN]	72.887	5.07178	2.95	6	2	1.28275	0.838432	0.841877	1.06667	1.28834	0.873629	0.807188	1.35995	0.0237607
P15328	Folate receptor alpha OS=Homo sapiens GN=FOLR1 PE=1 SV=3 - [FOLR1_HUMAN]	29.7992	7.97217	17.12	2	4	1.28504	0.661734	0.684911	0.804434	1.30444	0.625826	0.688818	0.83423	1.07562e-05
Q9UES0	SNARE protein Ykt6 (Fragment) OS=Homo sapiens PE=2 SV=1 - [Q9UES0_HUMAN]	21.5931	6.55127	4.19	5	1	1.29045	1.63855	1.01832	0.777223	1.44711	1.41764	0.770171	0.605015	0.0121271
E9PMM9	40S ribosomal protein S2 (Fragment) OS=Homo sapiens GN=RPS2 PE=1 SV=1 - [E9PMM9_HUMAN]	22.9605	10.8872	17.43	22	3	1.29355	1.6172	1.01753	0.836655	1.0298	1.44671	0.936641	0.718831	0.0140633
C9J1E7	AP-1 complex subunit beta-1 (Fragment) OS=Homo sapiens GN=AP1B1 PE=1 SV=1 - [C9J1E7_HUMAN]	65.2731	5.18604	2.6	24	1	1.29513	1.36789	0.961179	0.89454	1.04402	1.42805	1.74269	0.748295	0.328514
B4DGL0	cDNA FLJ53619, highly similar to Heat shock protein HSP 90-beta OS=Homo sapiens PE=2 SV=1 - [B4DGL0_HUMAN]	82.1186	5.05908	15.55	19	6	1.29719	0.948088	0.90723	1.00433	1.03331	0.911285	0.893678	1.14847	0.179918
G8XUV2	Visfatin (Fragment) OS=Bos taurus PE=4 SV=1 - [G8XUV2_BOVIN]	4.3553	8.54346	28.57	7	1	1.30297	0.985557	1.03977	0.969918	1.34336	1.03384	0.894936	1.03974	0.0125521
P29692	Elongation factor 1-delta OS=Homo sapiens GN=EEF1D PE=1 SV=5 - [EF1D_HUMAN]	31.1028	5.0083	16.73	29	3	1.31611	0.850993	1.18352	1.00819	1.389	0.892877	0.914262	0.979493	0.034141
L8IPN9	Dolichyl-diphosphooligosaccharide--protein glycosyltransferase subunit STT3B (Fragment) OS=Bos mutus GN=M91_19812 PE=4 SV=1 - [L8IPN9_9CETA]	82.6242	8.85107	1.11	4	1	1.3172	0.695325	1.01809	1.05828	1.25081	1.0636	1.52855	0.918639	0.325523
B4DPP0	cDNA FLJ51032, highly similar to CD9 antigen OS=Homo sapiens PE=2 SV=1 - [B4DPP0_HUMAN]	15.8952	6.7417	6.38	4	1	1.31825	0.492203	0.510214	1.71927	1.30388	0.581756	0.632243	1.1309	0.0263883
J3QRN2	Beta-2-glycoprotein 1 (Fragment) OS=Homo sapiens GN=APOH PE=4 SV=1 - [J3QRN2_HUMAN]	19.8938	7.75244	7.73	5	1	1.32194	0.808028	0.972915	1.41074	1.14006	0.680143	0.857676	1.08947	0.0596028
Q30B80	40S ribosomal protein S12 (Fragment) OS=Ovis aries PE=2 SV=1 - [Q30B80_SHEEP]	13.6501	6.31592	11.9	4	1	1.32272	1.51045	1.26593	0.761372	1.23021	1.27088	1.35109	0.573145	0.0104685
B4DV28	cDNA FLJ54170, highly similar to Cytosolic nonspecific dipeptidase OS=Homo sapiens PE=2 SV=1 - [B4DV28_HUMAN]	51.4693	6.43018	11.88	10	4	1.32652	0.83809	0.790467	0.887799	1.52938	0.868725	0.921275	0.991697	0.00933113
Q99541	Perilipin-2 OS=Homo sapiens GN=PLIN2 PE=1 SV=2 - [PLIN2_HUMAN]	48.0454	6.80029	47.83	6	11	1.3362	0.839176	0.77785	1.1683	1.36321	0.835059	0.849365	0.858798	0.026544
H3BNP9	Sulfide:quinone oxidoreductase, mitochondrial (Fragment) OS=Homo sapiens GN=SQRDL PE=1 SV=1 - [H3BNP9_HUMAN]	14.0689	7.12256	7.26	5	1	1.34531	1.16771	1.20945	0.839156	1.09849	1.04584	1.31903	1.06038	0.21739
B2RE46	cDNA, FLJ96923, highly similar to Homo sapiens ribophorin II (RPN2), mRNA OS=Homo sapiens PE=2 SV=1 - [B2RE46_HUMAN]	69.2911	5.78271	7.77	4	3	1.34573	0.925233	0.960824	0.996027	1.27966	1.00307	0.962856	1.06356	0.00341806
G3N2F0	Elongation factor 1-alpha OS=Bos taurus GN=EEF1A1 PE=3 SV=1 - [G3N2F0_BOVIN]	49.9227	8.22119	13.91	6	1	1.3481	1.38223	1.61142	0.236629	1.16704	2.00655	2.18459	0.365069	0.0228521
P02671	Fibrinogen alpha chain OS=Homo sapiens GN=FGA PE=1 SV=2 - [FIBA_HUMAN]	94.9144	6.01123	6.12	6	6	1.35357	0.668444	0.903347	0.907102	1.80385	0.73028	0.764815	0.948825	0.0220521
Q0V8K9	Solute carrier family 29 (Nucleoside transporters), member 1 (Fragment) OS=Bos taurus GN=SLC29A1 PE=2 SV=1 - [Q0V8K9_BOVIN]	49.1639	8.30908	3.33	5	1	1.35675	1.83678	0.93275	0.557937	1.18031	3.13145		0.367077	0.0724954
Q9NTC4	Putative uncharacterized protein DKFZp434K0126 (Fragment) OS=Homo sapiens GN=DKFZp434K0126 PE=2 SV=1 - [Q9NTC4_HUMAN]	47.5268	4.90674	5.1	9	2	1.36397	1.38313	1.06596	0.898273	1.13762	1.28494	1.31353	0.688295	0.065876
F5H1S8	Malectin (Fragment) OS=Homo sapiens GN=MLEC PE=1 SV=1 - [F5H1S8_HUMAN]	16.7186	5.56689	15.75	6	2	1.36512	0.910027	0.815438	1.17155	1.17597	1.01421	0.698588	1.1422	0.0150085
B4DEB9	cDNA FLJ61099, highly similar to ADP-ribosylation factor 1 OS=Homo sapiens PE=2 SV=1 - [B4DEB9_HUMAN]	19.6372	8.93896	32.37	23	4	1.37571	1.22616	0.867991	0.804678	1.11101	1.06993	1.33218	0.822337	0.292484
B4E0R0	cDNA FLJ54220, highly similar to Long-chain-fatty-acid--CoA ligase 1 (EC 6.2.1.3) OS=Homo sapiens PE=2 SV=1 - [B4E0R0_HUMAN]	74.206	7.32764	9.49	16	5	1.38106	0.726831	1.19175	0.91785	1.27327	0.80568	1.11528	0.991973	0.0028958
B4E2U0	6-phosphogluconate dehydrogenase, decarboxylating OS=Homo sapiens PE=2 SV=1 - [B4E2U0_HUMAN]	50.7598	8.17725	9.54	10	4	1.38161	0.802337	0.772999	1.1529	1.45813	0.716106	0.722498	1.03564	0.00103215
H7C4H2	Signal recognition particle receptor subunit beta (Fragment) OS=Homo sapiens GN=SRPRB PE=1 SV=1 - [H7C4H2_HUMAN]	17.6013	7.94287	6.25	5	1	1.38374	0.805887	0.750249	1.14374	1.35979	0.87587	0.659246	1.17408	0.000324626
H7BZJ3	Protein disulfide-isomerase A3 (Fragment) OS=Homo sapiens GN=PDIA3 PE=1 SV=1 - [H7BZJ3_HUMAN]	13.5108	7.29834	47.97	1	1	1.3844	0.803941	1.01188	0.894785	1.56834	0.837087	0.746788	1.02944	0.0189667
Q6WN34	Chordin-like protein 2 OS=Homo sapiens GN=CHRDL2 PE=1 SV=1 - [CRDL2_HUMAN]	47.4632	7.88428	21.21	10	4	1.38459	0.945136	0.738748	0.813338	1.60589	0.966415	0.885359	0.943443	0.00893889
Q5T0R7	Adenylyl cyclase-associated protein (Fragment) OS=Homo sapiens GN=CAP1 PE=1 SV=1 - [Q5T0R7_HUMAN]	19.1898	7.04932	13.22	11	1	1.389	0.956224	0.871101	1.03572	1.57094	1.09676	0.626234	0.729067	0.0377866
Q96AG4	Leucine-rich repeat-containing protein 59 OS=Homo sapiens GN=LRRC59 PE=1 SV=1 - [LRC59_HUMAN]	34.9089	9.56885	11.4	4	3	1.39081	0.696134	0.83351	0.967614	1.40152	0.70726	0.819444	0.956219	4.99099e-07
A4UCS6	Peroxiredoxin 6 (Fragment) OS=Homo sapiens PE=2 SV=1 - [A4UCS6_HUMAN]	9.00878	5.14795	17.5	2	1	1.39264	0.539547	0.334765	1.26195	1.56512	0.625528	0.59129	1.369	0.00228964
Q5QPP1	UDP-glucose 4-epimerase (Fragment) OS=Homo sapiens GN=GALE PE=1 SV=1 - [Q5QPP1_HUMAN]	21.4189	6.78564	7.22	6	1	1.39336	1.35632	1.45117	0.622029	0.789372	1.26158	2.77521	0.64342	0.166487
C5IJA8	Adenylate kinase isoenzyme 1 OS=Ovis aries GN=AK1 PE=2 SV=1 - [C5IJA8_SHEEP]	21.6363	8.32373	13.4	6	2	1.3978	0.729545	0.995573	0.826623	1.72591	1.01088	0.836507	0.745927	0.0282804
O60543	Cell death activator CIDE-A OS=Homo sapiens GN=CIDEA PE=1 SV=1 - [CIDEA_HUMAN]	24.6707	9.23193	10.05	7	2	1.40389	1.0118	0.882914	1.22963	1.13946	0.897918	0.801863	0.820673	0.248352
P01034	Cystatin-C OS=Homo sapiens GN=CST3 PE=1 SV=1 - [CYTC_HUMAN]	15.7891	8.74854	7.53	1	1	1.40451	0.48056	0.52028	0.922692	2.01262	0.61047	0.52349	1.16507	0.0206205
P07602	Prosaposin OS=Homo sapiens GN=PSAP PE=1 SV=2 - [SAP_HUMAN]	58.0739	5.17334	13.93	13	7	1.4079	0.905145	0.727086	0.781368	1.27983	0.764274	0.79623	0.840475	0.0041827
A0A024QZV0	HCG1811539, isoform CRA_b OS=Homo sapiens GN=hCG_1811539 PE=3 SV=1 - [A0A024QZV0_HUMAN]	36.155	5.46533	12.65	5	3	1.40798	0.993087	1.00952	0.847982	1.54174	0.91814	0.980089	0.845579	0.00121355
Q99735	Microsomal glutathione S-transferase 2 OS=Homo sapiens GN=MGST2 PE=1 SV=1 - [MGST2_HUMAN]	16.6098	9.5542	9.52	1	1	1.41608	0.994091	0.925682	0.981704	1.25504	0.926391	1.27539	0.952114	0.144913
G3V2K7	Transmembrane emp24 domain-containing protein 10 OS=Homo sapiens GN=TMED10 PE=1 SV=1 - [G3V2K7_HUMAN]	16.8937	6.52197	7.19	6	1	1.41814	1.02463	1.16684	0.860434	1.2576	0.924668	1.74391	0.726477	0.109035
B2R694	cDNA, FLJ92849, highly similar to Homo sapiens lanosterol synthase (2,3-oxidosqualene-lanosterol cyclase) (LSS), mRNA OS=Homo sapiens PE=2 SV=1 - [B2R694_HUMAN]	83.3702	6.60986	5.74	8	4	1.42642	0.960121	1.12389	1.01285	1.11783	0.948061	0.875595	0.890121	0.23186
B4DWS6	cDNA FLJ61181, highly similar to Homo sapiens hydroxysteroid (17-beta) dehydrogenase 12 (HSD17B12), mRNA OS=Homo sapiens PE=2 SV=1 - [B4DWS6_HUMAN]	33.5068	9.39307	7.24	7	2	1.43434	0.895002	1.03935	1.00192	1.22006	0.880134	1.06843	1.13991	0.0365296
P04792	Heat shock protein beta-1 OS=Homo sapiens GN=HSPB1 PE=1 SV=2 - [HSPB1_HUMAN]	22.7685	6.40479	25.37	9	4	1.4371	0.895459	0.938738	0.994279	1.36424	0.928854	0.898238	0.920685	0.00072199
D6RF34	Alpha-S1-casein OS=Homo sapiens GN=CSN1S1 PE=1 SV=1 - [D6RF34_HUMAN]	19.8768	5.5542	31.95	1	1	1.44561	0.397999	0.851085	0.649041	2.39343	0.563487	0.995011	0.607498	0.0445289
V9HWC6	Peptidyl-prolyl cis-trans isomerase OS=Homo sapiens GN=HEL-S-39 PE=2 SV=1 - [V9HWC6_HUMAN]	22.728	9.31982	10.58	2	2	1.45078	0.897735	0.731356	1.10643	1.03284	0.814152	0.702721	1.17525	0.0749894
A8K4W5	cDNA FLJ76813, highly similar to Homo sapiens acetyl-Coenzyme A acetyltransferase 2 (acetoacetyl Coenzyme A thiolase), mRNA OS=Homo sapiens PE=2 SV=1 - [A8K4W5_HUMAN]	41.3524	6.91748	2.02	3	1	1.45838	1.50923	1.33754	0.775917	0.877168	1.36031	1.43706	0.717537	0.0988514
H0Y8X1	Succinate dehydrogenase [ubiquinone] flavoprotein subunit, mitochondrial (Fragment) OS=Homo sapiens GN=SDHA PE=1 SV=1 - [H0Y8X1_HUMAN]	13.627	9.99365	11.11	15	1	1.45942	1.65067	1.34607	0.757258	0.969822	1.03395	1.5405	0.701212	0.206317
O02675	Dihydropyrimidinase-related protein 2 OS=Bos taurus GN=DPYSL2 PE=1 SV=1 - [DPYL2_BOVIN]	62.2386	6.37939	3.85	7	2	1.46635	0.815265	0.762003	0.986168	1.56892	0.822776	0.630552	0.976936	0.000567837
B4E1D8	cDNA FLJ51597, highly similar to C4b-binding protein alpha chain OS=Homo sapiens PE=2 SV=1 - [B4E1D8_HUMAN]	60.3658	6.65381	10.63	3	6	1.47201	0.826859	0.810051	0.921075	1.21307	0.773764	0.825093	1.09515	0.024445
H0YLF3	Beta-2-microglobulin form pI 5.3 (Fragment) OS=Homo sapiens GN=B2M PE=1 SV=1 - [H0YLF3_HUMAN]	8.49315	5.14795	14.08	7	1	1.48243	0.622396	0.484519	1.32391	1.54013	0.653104	0.475716	1.0642	0.00118601
A2VCQ4	PRKCSH protein (Fragment) OS=Homo sapiens GN=PRKCSH PE=2 SV=1 - [A2VCQ4_HUMAN]	20.2529	4.71631	7.18	5	1	1.48338	1.01575	0.620676	1.04821	1.24804	0.98691	0.656742	1.1909	0.00803293
Q9BS26	Endoplasmic reticulum resident protein 44 OS=Homo sapiens GN=ERP44 PE=1 SV=1 - [ERP44_HUMAN]	46.9414	5.26221	12.56	5	4	1.48368	0.877912	0.840109	1.04887	1.36482	0.793935	0.663662	1.18917	0.0067758
P23280	Carbonic anhydrase 6 OS=Homo sapiens GN=CA6 PE=1 SV=3 - [CAH6_HUMAN]	35.3446	7.02002	35.39	4	7	1.48434	0.666465	0.708585	1.05064	1.5235	0.745273	0.736214	0.710698	0.00854937
E9PP73	Coatomer subunit beta (Fragment) OS=Homo sapiens GN=COPB1 PE=1 SV=3 - [E9PP73_HUMAN]	55.5024	6.43018	4.32	5	1	1.48682	1.13493	0.820446	0.723922	1.51837	1.13465	1.40642	0.639253	0.0740237
O75612	Bile salt-dependent lipase oncofetal isoform (Fragment) OS=Homo sapiens PE=2 SV=1 - [O75612_HUMAN]	66.3215	6.63916	42.65	11	22	1.48905	0.728158	0.704161	0.475944	2.43494	0.656043	0.767657	0.479902	0.0362901
C7FFR6	Dolichol-phosphate mannosyltransferase subunit 1 OS=Bos taurus GN=DPM1 PE=2 SV=1 - [C7FFR6_BOVIN]	29.5877	9.61279	4.23	7	1	1.49449	0.587408	0.869015	1.09091	1.52341	0.801742	0.611883	0.982559	0.00869891
P18065	Insulin-like growth factor-binding protein 2 OS=Homo sapiens GN=IGFBP2 PE=1 SV=2 - [IBP2_HUMAN]	34.7912	7.50342	14.77	9	3	1.49978	0.722066	0.715713	0.79434	1.33267	0.831475	0.970215	0.876601	0.0158118
B4DWJ7	cDNA FLJ54968 OS=Homo sapiens PE=2 SV=1 - [B4DWJ7_HUMAN]	17.5135	8.36768	10.32	4	1	1.50976	0.972744	1.07621	0.845432	1.06561	1.08558	1.38586	1.00121	0.362591
C5IJ84	RAB10 OS=Ovis aries PE=2 SV=1 - [C5IJ84_SHEEP]	22.5746	8.38232	22.5	121	2	1.51024	1.00042	0.714079	0.951058	1.35613	0.680844	0.750098	1.17591	0.0320316
Q13410	Butyrophilin subfamily 1 member A1 OS=Homo sapiens GN=BTN1A1 PE=1 SV=3 - [BT1A1_HUMAN]	58.923	5.5415	40.49	22	15	1.51055	0.614594	0.697833	1.37018	1.34641	0.633186	0.818093	0.926763	0.0294649
H0Y9P0	Guanine nucleotide-binding protein subunit beta-2-like 1 (Fragment) OS=Homo sapiens GN=GNB2L1 PE=1 SV=1 - [H0Y9P0_HUMAN]	8.75522	4.42432	8.43	11	1	1.51141	0.944891	1.00196	1.04458	1.41099	0.72797	1.07271	0.715588	0.0393912
D3DP16	Fibrinogen gamma chain, isoform CRA_a OS=Homo sapiens GN=FGG PE=4 SV=1 - [D3DP16_HUMAN]	37.7142	6.29053	14.97	7	5	1.52101	0.501882	0.56465	0.89364	2.0455	0.658258	0.525029	0.908178	0.00902166
P05814	Beta-casein OS=Homo sapiens GN=CSN2 PE=1 SV=4 - [CASB_HUMAN]	25.3658	5.78271	42.92	1	6	1.52959	0.794629	0.73838	0.509211	2.27774	0.620868	1.04411	0.59992	0.0324171
A0A024RAD5	Dolichyl-diphosphooligosaccharide--protein glycosyltransferase 48 kDa subunit OS=Homo sapiens GN=DDOST PE=3 SV=1 - [A0A024RAD5_HUMAN]	50.6699	6.40479	4.82	7	2	1.54045	0.689427	1.16505	0.902233	1.10109	0.785968	1.27827	0.972722	0.0734648
B3VMW0	Lactoferrin OS=Homo sapiens PE=2 SV=1 - [B3VMW0_HUMAN]	78.307	8.11865	71.17	7	3	1.5405	0.467696	0.603348	1.08774	1.75743	0.546762	0.647335	1.10113	0.00052815
A8K9C4	Elongation factor 1-alpha OS=Homo sapiens PE=2 SV=1 - [A8K9C4_HUMAN]	50.1691	9.01221	26.62	69	5	1.54507	0.707012	0.697494	1.19987	1.30711	0.662334	0.673496	1.0092	0.00617313
P49327	Fatty acid synthase OS=Homo sapiens GN=FASN PE=1 SV=3 - [FAS_HUMAN]	273.254	6.44287	37.71	3	59	1.54574	0.918635	0.825999	0.945754	1.24354	0.890653	0.867924	0.907062	0.0219456
Q9UHD0	Interleukin-19 OS=Homo sapiens GN=IL19 PE=1 SV=2 - [IL19_HUMAN]	20.4385	7.69385	12.99	1	2	1.55214	0.608198	0.914677	0.709179	1.97332	0.783831	0.700148	0.900881	0.01429
J3KT73	60S ribosomal protein L38 OS=Homo sapiens GN=RPL38 PE=1 SV=1 - [J3KT73_HUMAN]	7.56027	9.99365	15.63	6	1	1.56006	0.958326	0.83072	0.991665	1.2738	0.918051	0.821414	0.984386	0.0161528
P47989	Xanthine dehydrogenase/oxidase OS=Homo sapiens GN=XDH PE=1 SV=4 - [XDH_HUMAN]	146.33	7.66455	39.68	1	27	1.56486	0.777138	0.668092	1.23309	1.27103	0.756419	0.800822	0.796681	0.0684017
B4DEI3	cDNA FLJ57715, highly similar to Voltage-dependent anion-selective channel protein 1 OS=Homo sapiens PE=2 SV=1 - [B4DEI3_HUMAN]	16.6847	9.39307	11.54	13	2	1.56629	0.291205	0.440856	1.40281	1.55315	0.401908	0.385164	1.24808	0.000133214
C4B6Q2	Osteopontin (Fragment) OS=Homo sapiens GN=opn PE=2 SV=1 - [C4B6Q2_HUMAN]	30.728	4.57666	8.06	16	2	1.56846	0.757203	0.963248	0.98582	0.938062	0.738158	0.879918	1.01149	0.296429
Q5CAQ5	Tumor rejection antigen (Gp96) 1 OS=Homo sapiens GN=TRA1 PE=2 SV=1 - [Q5CAQ5_HUMAN]	92.2823	4.85596	21.57	15	14	1.57303	0.79882	0.692286	0.828237	1.47295	0.734204	0.766427	0.921793	0.000531311
Q8N618	MYO1D protein (Fragment) OS=Homo sapiens GN=MYO1D PE=2 SV=2 - [Q8N618_HUMAN]	18.7129	9.77393	7.98	9	1	1.57689	1.30278	1.09785	1.10998	1	1.10778	1.03705	0.55556	0.503433
Q0VGA5	SARS protein OS=Homo sapiens GN=SARS PE=2 SV=1 - [Q0VGA5_HUMAN]	58.3698	6.43018	3.72	5	2	1.57793	0.674603	0.84172	1.10766	1.3616	0.626304	0.767206	0.991905	0.00333948
P07237	Protein disulfide-isomerase OS=Homo sapiens GN=P4HB PE=1 SV=3 - [PDIA1_HUMAN]	57.0807	4.86865	31.89	24	16	1.58081	0.756091	0.769077	0.848282	1.53257	0.793446	0.788719	0.797032	2.72341e-05
P47710	Alpha-S1-casein OS=Homo sapiens GN=CSN1S1 PE=1 SV=1 - [CASA1_HUMAN]	21.6576	5.37646	40.54	2	2	1.58337	0.738268	0.859114	0.489315	2.09857	0.76647	0.84943	0.648827	0.00886319
P00709	Alpha-lactalbumin OS=Homo sapiens GN=LALBA PE=1 SV=1 - [LALBA_HUMAN]	16.2141	4.99561	39.44	2	6	1.5858	0.569872	0.636384	0.629025	2.41009	0.618143	0.708724	0.595243	0.0212312
C9JXB8	60S ribosomal protein L24 OS=Homo sapiens GN=RPL24 PE=1 SV=1 - [C9JXB8_HUMAN]	14.3598	11.312	10.74	5	1	1.61408	0.991309	1.01506	1.00956	1.12694	0.768622	1.00135	0.949602	0.195542
Q49AG2	TMED5 protein OS=Homo sapiens GN=TMED5 PE=2 SV=1 - [Q49AG2_HUMAN]	19.88	4.95752	6.98	6	1	1.61578	0.605796	0.59907	0.812748	1.85004	0.786586	0.848311	0.826347	0.00430397
W5P5T8	Uncharacterized protein (Fragment) OS=Ovis aries GN=RPS7 PE=4 SV=1 - [W5P5T8_SHEEP]	19.8742	10.3013	6.9	4	1	1.62395	1.26777	1.24846	0.71203	0.970696	1.37175	1.72825	0.504858	0.133182
P07498	Kappa-casein OS=Homo sapiens GN=CSN3 PE=1 SV=3 - [CASK_HUMAN]	20.2926	8.92432	45.05	1	5	1.6437	0.617805	0.636785	0.654096	2.15332	0.683823	0.756302	0.636872	0.00605721
H7C597	Staphylococcal nuclease domain-containing protein 1 (Fragment) OS=Homo sapiens GN=SND1 PE=1 SV=1 - [H7C597_HUMAN]	26.2114	5.30029	6.93	9	1	1.64505	0.715869	0.852551	1.16314	1.26607	0.847609	1.33348	0.594708	0.257152
B4DSX0	cDNA FLJ61380, highly similar to Alpha-actinin-4 OS=Homo sapiens PE=2 SV=1 - [B4DSX0_HUMAN]	47.5341	8.44092	2.64	14	1	1.64811	0.676149	0.760136	1.23295	0.932556	0.795359	0.74484	1.3083	0.166125
P27824	Calnexin OS=Homo sapiens GN=CANX PE=1 SV=2 - [CALX_HUMAN]	67.5259	4.60205	8.11	12	5	1.65102	0.783898	0.845273	0.952177	1.18635	0.82487	1.06474	1.05522	0.106873
W8QEY1	Lactoferrin OS=Homo sapiens PE=2 SV=1 - [W8QEY1_HUMAN]	78.332	8.17725	71.17	4	1	1.66641	0.489494	0.248134	0.581293	2.9337	0.218392	0.854985	0.644257	0.0528262
A1A5C5	RRBP1 protein OS=Homo sapiens GN=RRBP1 PE=2 SV=1 - [A1A5C5_HUMAN]	84.2561	5.0083	2.4	9	2	1.66796	0.378088	0.533699	0.57945	1.98894	0.669418	0.495705	0.468966	0.00264617
A0A075B6F6	Minor histocompatibility antigen H13 (Fragment) OS=Homo sapiens GN=HM13 PE=1 SV=1 - [A0A075B6F6_HUMAN]	30.1427	7.88428	3.68	5	1	1.71854	0.909785	0.953693	0.881579	1.26862	0.982119	0.647049	0.878904	0.0714493
Q5T8U5	Surfeit 4 OS=Homo sapiens GN=SURF4 PE=1 SV=1 - [Q5T8U5_HUMAN]	21.1137	6.52197	8.6	10	1	1.72608		2.21295	0.530144	1.46551	1.05001	1.27993	0.447648	0.0896822
H3BQF1	Adenine phosphoribosyltransferase (Fragment) OS=Homo sapiens GN=APRT PE=1 SV=3 - [H3BQF1_HUMAN]	16.4265	8.99756	13.42	3	1	1.72621	0.310402	0.847509	1.03035	1.48641	1.33053	0.614557	0.593671	0.254385
P61626	Lysozyme C OS=Homo sapiens GN=LYZ PE=1 SV=1 - [LYSC_HUMAN]	16.5263	9.15869	45.95	18	5	1.74376	0.880376	0.645242	0.683036	1.80168	0.899844	0.979876	0.785108	0.0033959
H0YL11	Isocitrate dehydrogenase [NADP], mitochondrial OS=Homo sapiens GN=IDH2 PE=1 SV=1 - [H0YL11_HUMAN]	35.3077	8.83643	2.88	5	1	1.74979	0.591921	0.711384	1.37268	0.946647	0.554948	1.0767	1.05116	0.234359
H9TKZ5	Eef1b OS=Capra hircus GN=eef1b PE=2 SV=1 - [H9TKZ5_CAPHI]	24.7753	4.66553	11.56	5	1	1.75299	1.28236	0.984337	0.804756	1.04777	1.09979	1.10747	0.703216	0.240322
B4DNR3	cDNA FLJ52710, highly similar to Abhydrolase domain-containing protein 14B OS=Homo sapiens PE=2 SV=1 - [B4DNR3_HUMAN]	19.7842	6.40479	5.41	6	1	1.80507	1.2961	0.814904	1.17437	0.800441	1.4183	0.726284	0.514259	0.476442
Q53G71	Calreticulin variant (Fragment) OS=Homo sapiens PE=2 SV=1 - [Q53G71_HUMAN]	46.8901	4.44971	18.72	9	7	1.86199	1.02648	0.907024	0.846683	0.908338	0.990156	0.920966	0.853671	0.476474
Q8TC12	Retinol dehydrogenase 11 OS=Homo sapiens GN=RDH11 PE=1 SV=2 - [RDH11_HUMAN]	35.3634	8.82178	4.4	1	1	1.88014	0.750747	0.806708	0.827277	1.15115	0.815675	1.37501	0.858395	0.247961
W5PHJ8	40S ribosomal protein S4 OS=Ovis aries PE=3 SV=1 - [W5PHJ8_SHEEP]	26.049	9.96436	3.9	10	1	1.88736	0.926417	0.92476	0.937831	1.29822	0.817313	1.07548	0.447837	0.110383
B2R856	Acyl-coenzyme A oxidase OS=Homo sapiens PE=2 SV=1 - [B2R856_HUMAN]	77.5078	7.38623	1.57	2	1	1.91225	0.863739	0.874058	0.641538	1.40145	0.823123	1.14591	0.709965	0.0319902
L8HWD3	Uncharacterized protein OS=Bos mutus GN=M91_03358 PE=3 SV=1 - [L8HWD3_9CETA]	14.6887	9.67139	8.33	8	1	1.98009	1.11161	0.827516	0.712212	1.09716	1.03409	0.974784	0.731456	0.204834
G9I6H4	BNF1 variant (Fragment) OS=Homo sapiens GN=bnf1 PE=2 SV=1 - [G9I6H4_HUMAN]	15.3272	7.63525	30.15	2	1	2.04487	0.947823	1.30533	0.759824	0.582225	0.94278	1.72628	0.759117	0.548914
B4DUK7	cDNA FLJ59991, highly similar to Elongation factor 1-gamma OS=Homo sapiens PE=2 SV=1 - [B4DUK7_HUMAN]	22.9105	8.5874	11.06	14	2	2.10897	0.740905	0.841692	1.05054	1.40802	0.759313	0.55729	0.898164	0.0517873
G3MY14	Uncharacterized protein (Fragment) OS=Bos taurus GN=PRPS2 PE=4 SV=1 - [G3MY14_BOVIN]	23.5412	6.72705	4.63	5	1	2.17678	0.258015	0.388087	0.863378	1.8416	0.557904	0.222037	0.700649	0.00210434
W5PQK3	Uncharacterized protein (Fragment) OS=Ovis aries GN=PFKL PE=3 SV=1 - [W5PQK3_SHEEP]	82.5919	7.35693	2.26	4	1	2.21675	0.728004	0.883834	0.874587	0.696043	0.817229	0.800175	1.09586	0.628973
L8HU39	Uncharacterized protein OS=Bos mutus GN=M91_03302 PE=4 SV=1 - [L8HU39_9CETA]	10.2818	10.1401	9.78	12	1	2.22534	0.619563	0.879056	0.835769	1.06806	0.645222	0.937168	0.76895	0.21077
O77777	Beta-lactoglobulin variant D (Fragment) OS=Bos taurus GN=LGB PE=4 SV=1 - [O77777_BOVIN]	5.18571	4.43701	97.87	1	1		4.73672	3.14367	0.0644786		3.7256	1.95282		0.164005
